# Supplementary material for: BDNF/TrkB signaling endosomes in axons coordinate CREB/mTOR activation and protein synthesis in the cell body to induce dendritic growth in cortical neurons
Source: eLife. 2023 Feb 24;12:e77455. doi: 10.7554/eLife.77455 (PMC9977295; doi:10.7554/eLife.77455)
Supplement: Figure 1—source data 1. [file elife-77455-fig1-data1.xlsx]

## Sheet: Figure 1B
Sholl analysis without TrkBfc									Sholl analysis with TrkBfc
	Control			BDNF					control		BDNF
Distance um	Average	Standard dev		Average	Standard dev			Distance um	Average	Standard dev		Average	Standard dev
5	1.75676	1.23391		1.78431	1.39064			5	6.66667	3.20416		7	1.91485
10	5.05405	2.12061		6.5098	2.54661			10	10.5	3.61939		11.5714	2.22539
15	5.56757	2.93012		8.62745	3.28371			15	11.8333	2.31661		11.8571	2.67261
20	6.08108	3.41059		8.94118	3.21401			20	9.5	2.34521		10.1429	3.18479
25	5.64865	2.4062		9.07843	3.95486			25	8.83333	3.3116		9.14286	3.33809
30	5.13514	2.22564		7.88235	4.08079			30	7.33333	3.6697		8.28571	3.03942
35	4.72973	2.35288		6.94118	4.23992			35	5.33333	2.16025		5.42857	2.29907
40	4.13514	1.94597		6.07843	3.71981			40	3.16667	2.85774		4.42857	1.61835
45	3.75676	1.847		5.66667	3.46787			45	1.83333	1.94079		3.57143	2.29907
50	3.08108	1.58777		4.76471	2.80468			50	1.33333	1.96638		3.14286	2.96808
55	2.94595	1.4897		4.14	2.66841			55	1.16667	1.94079		2.71429	3.09377
60	2.35135	1.3169		3.66	2.38839			60	0.333333	0.516398		1.71429	1.79947
65	2.18919	1.63023		3.64	2.24286			65	0	0		1	1
70	1.78378	1.3771		3.14	2.10723			70	0	0		0.571429	0.786796
75	1.62162	1.23269		2.54	1.53896			75	0	0		0.142857	0.377964
80	1.2973	0.967955		2.42	1.49787			80	0	0		0.142857	0.377964
85	1.24324	1.0112		2.28	1.45657			85	0	0		0.142857	0.377964
90	0.972973	0.927556		1.96	1.29553			90	0	0		0.142857	0.377964
95	0.891892	0.965625		1.88	1.38044			95	0	0		0	0
100	0.837838	0.866459		1.58	1.2015			100	0	0		0	0

## Sheet: Figure 1 D
Number of primary dendrites
	Control	BDNF	K252a	K252a+BDNF
	4	11	9	5
	4	11	8	5
	3	10	10	7
	5	8	8	5
	5	10	7	7
	4	7	8	5
	7	11	7	5
	5	7	4	7
	5	7	8	8
	6	7	5	8
	3	9	7	4
	7	10	8	8
	3	13	5	6
	4	6	8	4
	5	7	4	11
	6	9	6	6
	8	7	9	9
	7	9	7	4
	5	10	7	11
	5	9		10
	7	8		3
	4	5		9
	4	12		4
	7	11		6
	6	10		12
	6	14		7
	6	10		7
	10	7		9
	8	8		4
	8	11		10
	8	12		9
	6	12		6
	5	8		9
	5	11		7
	6	7		6
	5	11		7
	8	8
	11	10
	7	10
	8	14
	5	17
	9	7
	5	9
	5	9
	3	7
	10	7
	8	11
		8
		14
Average	5.97872	9.5102	7.10526	6.94444
Standard Dev	1.93918	2.43347	1.66315	2.29215
Standard Error	0.282858	0.347638	0.381554	0.382026

## Sheet: Figure 1 E
	Branching points
	Control	BDNF	K252a	K252a+BDNF
	6	12	10	4
	6	11	11	6
	6	16	6	6
	7	8	11	6
	7	14	6	3
	6	11	3	5
	6	14	5	5
	10	13	4	6
	7	7	6	5
	9	10	5	6
	3	10	8	3
	6	7	7	3
	8	12	7	3
	6	8	3	3
	6	9	3	13
	5	11	7	5
	5	11	5	4
	10	11	6	4
	8	10	4	11
	4	10		4
	6	13		3
	4	14		3
	3	19		7
	4	11		6
	6	7		7
	5	9		6
	7	8		4
	6	9		8
	6	13		4
	13			9
	5	11		5
	10	12		5
	4	17		9
	6	16		4
	5	15		4
	3	17		4
	9	7
	3	19
	3	14
	4	10
	6	15
	4	7
	3	14
	6	14
	5	5
	6	12
	4	10
		14
		16
Average	5.89362	11.7292	6.15789	5.36111
Standard Dev	2.15925	3.33096	2.47797	2.31952
Standard Error	0.314959	0.480783	0.568486	0.386586

## Sheet: Figure 1 F
Sholl
Distance um	Control
5	1	3	6	4	3	5	1	2	2	2	2	1	1	1	3	2	3	1	1	1	1	1	1	2	1	1	1	3	1	1	1	1	1	1	1	1	1
10	6	4	7	7	5	5	4	2	3	3	4	1	5	2	7	3	7	3	9	5	7	3	6	6	5	3	9	8	7	3	6	7	5	3	3	9	5
15	5	3	1	7	5	4	4	2	3	5	4	1	4	3	5	2	6	5	10	6	8	4	13	5	6	4	9	7	9	9	6	10	6	5	3	13	4
20	7	5	1	7	8	4	4	2	2	6	4	2	4	4	4	2	4	6	13	10	6	5	15	7	5	3	10	10	9	11	4	12	7	4	3	10	5
25	6	7	1	5	8	4	5	3	4	5	5	2	6	3	2	3	4	3	8	9	8	5	10	5	5	4	6	7	9	7	8	11	8	5	3	7	8
30	5	6	1	4	7	4	7	3	6	5	4	3	5	7	1	4	3	2	6	7	7	7	3	5	5	3	5	8	10	7	8	10	6	5	2	3	6
35	5	7	1	4	8	3	6	4	7	5	3	2	6	9	1	4	2	7	3	6	4	6	1	3	4	2	6	9	10	6	5	7	6	3	2	3	5
40	4	6	2	2	5	3	6	4	8	6	3	2	5	7	1	2	2	6	3	6	4	6	0	3	3	2	6	6	7	5	6	6	4	4	3	2	3
45	3	4	2	2	6	3	7	3	5	7	4	2	5	4	1	2	2	5	2	4	3	6	0	4	2	3	5	5	9	4	6	4	3	4	3	2	3
50	3	4	1	2	2	3	5	3	5	6	4	2	5	1	1	2	2	3	2	4	1	5	0	3	2	4	4	5	7	3	5	3	3	2	3	1	3
55	3	2	1	2	3	2	4	2	7	5	4	3	4	1	2	3	3	3	2	4	0	5	0	3	4	2	4	4	6	2	4	3	3	2	3	1	3
60	3	0	1	2	1	1	4	1	4	4	3	2	4	1	2	3	3	4	3	2	0	4	0	2	4	2	2	4	5	2	2	2	3	1	3	1	2
65	1	0	2	1	2	1	4	1	5	4	2	2	4	1	2	3	3	2	4	1	0	5	0	2	6	2	0	3	4	2	1	1	3	0	5	1	1
70	1	0	1	1	2	1	4	1	4	4	1	2	4	1	4	2	2	2	2	1	0	3	0	1	2	1	0	3	4	2	0	1	3	0	4	0	2
75	0	0	4	1	2	1	3	2	4	3	1	2	4	1	1	2	2	2	2	1	0	3	0	1	3	1	0	2	3	1	0	1	2	0	3	0	2
80	0	0	2	1	2	1	1	2	3	2	1	2	3	1	1	1	3	2	1	1	0	3	0	1	1	1	0	2	1	1	0	1	2	0	3	0	2
85	0	0	2	1	2	1	1	3	3	2	1	2	3	2	1	1	1	2	1	1	0	3	0	1	1	1	0	2	0	1	0	0	2	0	3	0	2
90	0	0	2	1	2	1	0	2	0	2	1	2	2	1	1	1	1	2	1	1	0	2	0	1	0	1	0	2	0	1	0	0	1	0	4	0	1
95	0	0	2	1	2	1	0	0	0	1	1	2	3	1	1	1	1	3	1	1	0	2	0	0	0	1	0	2	0	1	0	0	0	0	3	0	2
100	0	0	2	1	2	2	0	0	0	1	1	2	1	2	1	1	1	1	1	2	0	2	0	0	0	1	0	1	0	1	0	0	0	0	3	0	2
	BDNF
Distance um	1	1	3	3	3	1	5	4	1	6	4	1	1	1	1	1	1	1	1	1	1	2	1	1	1	1	1	2	3	1	1	2	1	2	1	2	2	2	2
5	11	10	8	6	4	3	7	6	6	8	3	7	11	4	6	3	7	3	10	10	8	7	7	5	4	8	8	3	5	6	3	4	4	4	4	6	3	7	4
10	15	15	18	6	5	2	10	8	8	10	4	14	14	6	11	7	8	6	14	7	7	8	8	9	7	9	7	4	9	5	5	5	5	7	4	8	4	7	6
15	13	15	14	5	11	3	11	6	12	8	3	14	18	4	13	9	10	8	10	9	9	9	8	7	9	8	7	4	6	6	5	8	6	8	4	7	4	7	7
20	11	13	12	9	16	2	13	7	16	7	6	11	22	5	17	12	7	9	14	10	8	9	4	8	9	5	5	4	7	6	9	7	7	9	4	5	7	4	8
25	7	11	13	10	13	6	11	4	16	5	4	7	18	6	17	12	6	10	14	10	8	7	3	9	7	3	4	5	6	4	8	8	5	8	3	4	7	4	8
30	5	8	10	10	13	3	8	1	16	6	5	5	18	5	17	12	8	10	12	9	7	5	2	9	4	2	4	4	3	3	9	9	6	7	3	4	9	3	8
35	4	8	8	14	13	4	9	1	14	5	6	4	15	6	12	7	6	9	7	5	4	5	2	6	5	1	3	3	1	4	9	7	5	5	4	4	8	3	7
40	5	7	6	14	17	5	8	1	12	4	8	5	13	6	10	4	5	8	6	6	2	5	2	6	3	1	3	3	1	4	8	4	2	3	3	3	5	4	5
45	3	5	5	12	8	3	8	1	11	2	6	3	11	6	10	4	6	8	3	4	3	5	3	2	3	1	2	3	1	4	7	6	1	1	2	4	4	4	5
50	3	6	2	11	10	3	8	1	8	3	4	2	8	4	11	3	5	7	2	5	3	5	2	3	3	1	3	2	1	2	5	5	1	1	1	4	5	4	4
55	2	5	2	11	6	6	6	1	8	1	4	3	7	2	8	5	5	6	1	3	3	5	2	3	3	1	3	2	1	2	5	4	1	0	1	3	4	2	4
60	2	6	2	6	8	4	5	4	10	1	2	3	4	2	7	5	5	6	1	2	2	4	2	3	2	1	3	1	1	2	4	3	1	0	1	3	3	2	4
65	2	5	2	5	3	8	3	1	8	1	2	3	4	4	6	4	3	5	1	2	2	2	2	3	2	1	3	1	1	2	4	3	1	0	2	2	3	2	4
70	3	4	2	4	3	4	3	1	6	1	1	3	2	3	2	3	3	5	1	2	2	2	2	3	1	1	1	1	1	2	3	3	1	0	1	2	2	3	4
75	2	3	1	5	3	4	2	1	4	3	1	1	2	2	2	4	2	4	1	5	2	4	2	3	0	1	1	1	2	2	4	3	1	0	1	1	3	3	3
80	2	2	1	1	1	4	6	0	4	3	1	1	2	3	2	4	3	3	1	2	1	4	2	3	0	1	1	1	2	2	3	3	1	0	1	1	1	2	3
85	2	1	0	1	1	4	1	0	4	2	1	1	3	4	2	2	3	3	1	2	0	3	2	3	0	1	0	1	0	2	2	4	1	0	1	1	1	3	2
90	2	1	0	1	0	3	0	0	4	3	1	1	3	3	1	3	4	3	0	3	0	3	2	2	0	1	0	1	0	2	1	2	2	0	1	1	1	2	0
95	4	2	0	1	0	3	0	0	4	1	0	1	3	2	1	2	3	3	0	3	0	3	1	2	0	1	0	1	0	2	0	1	2	0	1	1	0	1	0
100
Distance um	K252A
5	1	2	1	1	1	1	1	2	3	1	1	2	1	2	1	2	2	2	2
10	8	7	7	5	4	8	8	3	5	6	3	4	4	4	4	6	3	7	4
15	7	8	8	9	7	9	7	4	9	5	5	5	5	7	4	8	4	7	6
20	9	9	8	7	9	8	7	4	6	6	5	8	6	8	4	7	4	7	7
25	8	9	4	8	9	5	5	4	7	6	9	7	7	9	4	5	7	4	8
30	8	7	3	9	7	3	4	5	6	4	8	8	5	8	3	4	7	4	8
35	7	5	2	9	4	2	4	4	3	3	9	9	6	7	3	4	9	3	8
40	4	5	2	6	5	1	3	3	1	4	9	7	5	5	4	4	8	3	7
45	2	5	2	6	3	1	3	3	1	4	8	4	2	3	3	3	5	4	5
50	3	5	3	2	3	1	2	3	1	4	7	6	1	1	2	4	4	4	5
55	3	5	2	3	3	1	3	2	1	2	5	5	1	1	1	4	5	4	4
60	3	5	2	3	3	1	3	2	1	2	5	4	1	0	1	3	4	2	4
65	2	4	2	3	2	1	3	1	1	2	4	3	1	0	1	3	3	2	4
70	2	2	2	3	2	1	3	1	1	2	4	3	1	0	2	2	3	2	4
75	2	2	2	3	1	1	1	1	1	2	3	3	1	0	1	2	2	3	4
80	2	4	2	3	0	1	1	1	2	2	4	3	1	0	1	1	3	3	3
85	1	4	2	3	0	1	1	1	2	2	3	3	1	0	1	1	1	2	3
90	0	3	2	3	0	1	0	1	0	2	2	4	1	0	1	1	1	3	2
95	0	3	2	2	0	1	0	1	0	2	1	2	2	0	1	1	1	2	0
100	0	3	1	2	0	1	0	1	0	2	0	1	2	0	1	1	0	1	0
Distance um	BDNF+K252A
5	5	1	5	5	3	4	4	1	4	1	2	1	2	3	1	2	1	1	4	1	3	2	1	1	3	1
10	2	8	4	4	7	4	5	4	9	9	3	10	3	5	10	8	9	9	3	10	4	6	10	7	5	6
15	2	9	6	5	5	5	6	5	9	9	4	10	2	4	11	7	9	11	4	10	8	7	11	7	3	10
20	4	2	6	4	6	4	8	5	10	11	6	9	5	3	11	4	5	12	5	12	5	8	12	7	6	8
25	3	2	5	5	7	5	6	3	10	6	5	8	6	5	10	7	5	12	4	11	6	8	9	6	5	8
30	3	2	7	5	7	5	5	2	9	4	5	7	4	5	9	5	5	8	4	12	6	7	6	6	3	9
35	3	1	7	8	7	8	4	2	7	1	4	6	3	6	7	6	4	7	4	9	3	6	3	5	3	6
40	3	0	4	3	9	5	3	2	6	1	4	6	2	4	8	6	6	4	5	8	2	5	2	7	2	4
45	3	0	3	2	10	3	3	2	4	1	3	5	2	4	6	7	2	4	3	7	1	5	2	5	1	4
50	3	0	1	2	5	7	3	2	3	1	5	4	2	5	7	5	2	3	3	9	1	4	2	4	1	2
55	3	0	1	2	4	1	3	2	3	1	3	2	2	4	4	3	3	4	2	9	1	2	2	3	1	2
60	3	0	1	1	4	2	4	2	5	1	2	2	2	5	3	4	2	4	2	7	1	3	3	2	1	2
65	1	0	0	1	3	2	3	2	3	1	2	2	2	2	3	4	2	4	2	6	1	2	2	0	1	2
70	1	0	0	1	5	1	3	2	1	1	2	2	2	1	3	5	2	3	1	6	1	2	1	0	1	1
75	1	0	0	1	4	1	3	1	1	1	2	2	2	2	2	4	1	2	1	6	1	2	1	0	1	1
80	1	0	0	0	2	0	2	1	1	1	2	2	1	2	2	2	1	2	1	3	1	2	1	0	1	1
85	1	0	0	0	2	0	2	0	0	1	2	2	1	1	2	3	0	1	1	3	0	2	1	0	1	0
90	1	0	0	0	3	0	2	0	0	1	2	1	1	2	2	3	0	0	1	3	0	2	1	0	1	0
95	1	0	0	0	3	0	2	0	0	1	2	1	1	1	3	3	0	0	1	2	0	4	1	0	1	0
100	1	0	0	0	3	0	4	0	0	1	1	1	2	1	3	3	0	0	1	3	0	3	1	0	1	0

## Sheet: Figure 1 H 
Number of primary dendrites
	Control	BDNF	1NM-PP1	1NM-PP1+BDNF
	8	11	3	7
	4	7	7	8
	5	10	7	7
	3	9	2	10
	5	8	4	7
	8	9	6	11
	9	10	11	8
	2	5	4	2
	4	7	6	5
	7	10	3	4
	5	11	3	6
	7	8	5	3
	7	8	7	7
	9	9	2	7
	6	16	7	5
	13	14	8	6
	8	13	8	8
	7	14	9	6
	6	11	12	10
	7	15	7	8
	8	10	6	7
	6	8	7	8
	8	7	9	8
	6	8	5	7
	9	10	7	9
	7	10	9	6
	10	11	8	7
	6	8	6	11
	6	7	8	3
	5	8	5	9
	7	7	6	6
	6	12	7	5
	6	8	7	6
	8	8	6	6
	6	9	4	7
	6	12	8	4
	7	11	5	6
	5	8	6	5
	7	11	7	5
	8	12	5	6
	7	9	7	5
	4	14	5	8
	5		7	6
	6
	6
Average	6.55556	9.83333	6.30233	6.62791
Standard Dev	1.90162	2.4685	2.14404	2.00028
Standard Error	0.283477	0.380898	0.326963	0.305039

## Sheet: Figure 1 I
Branching points
	Control	BDNF	1NM-PP1	1NM-PP1+BDNF
	8	13	6	7
	4	11	8	3
	8	13	8	8
	12	12	6	7
	9	16	11	7
	10	11	9	7
	6	16	8	5
	6	15	5	6
	7	9	2	10
	7	8	7	6
	5	8	7	7
	8	11	8	7
	5	6	5	10
	12	7	7	9
	6	12	7	7
	9	6	8	12
	2	12	7	4
	6	13	4	7
	8	11	6	5
	7	9	7	8
	6	7	10	5
	5	8	4	5
	4	17	6	6
	5	12	8	5
	4	24	5	8
	11	4	6	5
	7	12	8	5
	4	9	7	5
	4	9	6	8
	2	12	8	6
	8	7	7	6
	8	7	5	5
	3	9	13	9
	6	9	9	5
	5	10	3	4
	4	12	5	7
	5	13	4	4
	5	6	8	8
	5	11	3	6
	5	9	3	7
	6	21	5	6
	5	14	3	11
	3	18	6	6
	5
	7
Average	6.15556	11.1395	6.46512	6.60465
Standard Dev	2.35445	4.06835	2.25038	1.92897
Standard Error	0.350981	0.620418	0.34318	0.294165

## Sheet: Figure 1 J
Sholl
Distance um	Control
5	1	2	2	3	3	1	2	1	2	1	1	1	1	1	1	1	1	1	3	1	1	3	1	1	1	1	1	1	1	1	1	1	1	1	1	1	1	1	1	1	1	1	1	1	1
10	8	2	7	4	9	5	4	4	4	5	6	6	4	7	6	11	7	6	5	7	7	4	7	5	8	6	5	5	4	4	3	6	5	5	4	6	4	4	8	4	5	3	6	2	4
15	10	2	8	5	10	5	6	4	8	5	7	9	4	8	8	15	7	7	6	8	7	4	8	7	9	4	12	6	6	5	7	6	6	6	4	9	6	5	8	4	12	4	6	6	7
20	8	3	7	5	7	6	4	5	6	5	7	10	6	7	8	13	8	7	6	8	9	4	9	6	11	5	10	7	8	5	8	9	7	10	5	9	7	6	8	5	7	4	6	7	5
25	5	4	5	5	6	6	4	5	6	5	6	11	7	11	10	16	9	9	6	9	6	6	10	7	11	3	10	7	9	5	10	12	6	10	5	6	7	9	8	5	8	7	7	8	6
30	5	4	8	4	7	4	4	5	6	5	5	10	7	8	8	16	9	8	6	11	5	7	9	6	10	2	10	6	9	5	9	9	5	10	6	6	8	3	7	7	8	7	6	7	5
35	4	5	6	3	7	5	2	5	5	5	6	8	8	6	7	15	8	5	5	10	6	6	10	6	11	2	5	4	8	3	7	7	5	7	7	7	8	3	7	5	8	6	3	7	4
40	3	5	7	5	5	4	3	4	6	6	5	8	8	4	6	14	9	4	4	7	3	3	9	5	8	2	3	4	6	3	8	6	6	6	6	6	7	1	6	6	6	4	3	6	6
45	3	5	7	5	4	5	3	3	4	4	4	7	7	4	8	9	8	3	4	7	4	4	7	6	8	2	2	4	4	3	9	5	4	5	6	5	6	1	5	6	5	6	3	6	6
50	4	5	4	4	4	4	3	1	4	3	3	6	7	5	7	5	6	3	4	4	3	3	7	5	6	4	2	3	2	2	7	3	3	3	5	5	5	1	4	5	3	3	3	4	5
55	4	3	2	6	3	6	3	2	4	4	3	5	6	4	5	6	5	3	4	5	2	4	7	3	7	4	2	3	2	2	6	3	2	3	3	5	5	1	4	5	3	3	2	3	5
60	4	3	2	4	3	6	4	1	2	5	3	4	5	4	5	4	4	3	4	4	3	3	7	2	5	3	2	3	2	1	6	4	1	4	3	2	4	1	4	5	3	3	2	2	5
65	4	3	2	4	3	5	7	1	2	4	2	4	5	4	5	3	5	3	4	4	3	3	5	1	4	3	1	3	2	0	3	4	1	3	3	1	0	1	3	5	2	3	2	2	3
70	4	3	2	5	3	5	6	1	1	2	2	4	4	2	5	2	6	2	4	4	3	3	4	1	5	6	2	3	1	0	3	4	0	1	2	1	0	1	2	3	1	3	1	2	3
75	4	2	2	3	3	5	5	1	1	2	1	3	2	1	5	2	6	2	4	2	3	3	4	1	5	4	2	2	0	0	4	2	0	1	1	1	0	1	2	4	1	3	1	2	4
80	5	1	2	2	3	6	5	1	1	2	1	3	2	3	3	3	5	2	3	2	3	3	4	1	5	4	2	2	0	0	2	1	0	0	1	1	0	1	2	3	1	3	1	2	3
85	5	1	1	0	1	3	2	1	2	3	1	3	2	1	2	2	4	2	3	2	2	2	4	1	6	4	3	2	0	0	2	1	0	0	1	0	0	1	1	4	1	1	1	3	2
90	6	1	1	0	1	2	3	1	2	3	1	2	2	1	2	3	4	2	2	2	2	3	3	1	6	4	3	2	0	0	1	0	0	0	1	0	0	1	1	3	1	1	0	3	1
95	4	1	1	0	1	1	3	1	2	2	1	2	2	1	2	3	4	2	1	1	2	2	3	1	7	3	3	1	0	0	1	0	0	0	2	0	0	1	0	3	1	1	0	3	1
100	3	1	1	0	1	1	4	1	2	2	1	2	2	1	2	3	5	2	0	0	2	1	3	1	6	3	2	1	0	0	0	0	0	0	2	0	0	1	0	2	1	0	0	2	0
Distance um	BDNF
5	1	1	1	1	1	2	1	2	1	1	2	1	1	1	1	1	1	1	1	1	1	1	1	1	1	1	1	1	1	1	1	1	1	1	1	1	1	1	1	1	1	1	1
10	10	5	8	6	5	7	10	5	4	7	11	7	5	5	6	4	11	8	9	7	13	10	6	7	7	2	3	9	4	4	3	9	7	4	3	6	6	5	3	8	6	7	6
15	10	7	8	6	5	7	12	6	7	10	13	9	5	8	8	9	14	12	14	10	17	11	7	7	7	8	9	11	5	5	3	7	9	6	6	8	12	13	9	9	14	11	17
20	10	8	8	7	10	11	8	6	9	10	13	10	8	8	10	10	15	16	15	12	16	12	8	9	7	10	11	13	8	8	5	8	11	6	7	11	13	16	12	8	15	12	18
25	7	10	10	9	7	10	8	6	9	10	10	11	8	9	10	11	16	18	14	12	12	11	9	9	8	11	10	12	8	8	8	7	10	6	8	8	13	12	13	7	14	12	16
30	6	8	9	7	8	12	8	7	8	9	9	6	5	11	10	15	13	17	16	13	11	10	9	8	9	10	13	9	8	7	6	7	10	9	7	11	13	12	14	5	11	10	14
35	6	6	7	7	10	14	7	5	7	7	8	5	7	11	10	15	11	12	13	11	8	9	8	7	8	11	15	8	3	7	9	7	7	7	9	9	12	10	11	8	7	9	12
40	5	5	7	5	7	13	7	5	6	6	5	3	7	11	8	13	10	10	11	11	6	9	8	7	8	8	12	7	3	7	9	7	7	7	7	4	11	9	11	8	6	9	11
45	5	5	6	5	8	8	9	5	5	5	5	3	8	10	7	14	8	7	6	6	3	6	4	5	8	6	11	5	2	8	10	6	8	8	7	5	10	9	10	8	3	9	8
50	3	4	6	4	4	9	6	6	5	5	3	2	7	10	8	10	9	6	5	3	4	5	4	7	6	6	11	4	2	6	7	5	9	9	6	4	11	6	8	7	3	8	7
55	1	4	6	4	3	8	5	6	3	5	4	2	10	10	7	8	6	7	4	3	4	5	4	7	6	5	11	5	4	4	5	5	5	6	6	5	11	7	6	5	4	4	8
60	1	4	5	4	3	6	7	5	2	2	4	3	9	11	7	9	6	7	2	3	5	5	3	5	6	3	6	3	3	2	5	5	3	6	5	5	8	5	5	4	5	3	6
65	1	3	4	5	3	2	7	5	2	2	4	3	9	8	6	9	8	6	2	2	3	6	4	4	7	3	4	3	4	2	3	6	5	5	5	3	7	4	3	4	7	4	4
70	1	2	4	5	3	1	4	6	2	0	4	2	9	7	6	8	6	5	3	2	3	5	4	3	6	3	3	3	4	1	2	5	3	4	5	4	7	3	3	3	7	4	5
75	2	2	3	5	3	1	2	6	3	0	3	2	9	6	7	11	5	3	3	2	3	5	4	3	6	1	4	3	3	0	2	5	3	3	4	4	6	2	2	4	4	3	5
80	2	1	2	5	3	1	2	6	4	0	2	3	8	6	7	9	4	2	3	1	2	5	3	3	7	1	3	3	2	0	2	4	0	3	2	4	4	2	2	4	4	4	4
85	2	1	2	5	3	2	2	5	3	0	2	2	6	4	7	8	4	2	4	1	2	5	2	4	5	1	3	4	1	0	2	4	0	3	1	3	3	1	2	3	6	5	1
90	2	1	2	5	1	2	1	6	3	0	2	2	5	3	7	8	4	2	4	2	2	4	1	4	5	1	2	3	1	0	0	4	0	4	2	4	2	1	2	3	6	7	1
95	2	0	0	4	1	0	2	5	2	0	2	2	4	2	6	7	3	1	3	1	3	4	1	2	5	1	2	3	1	0	0	4	0	3	2	4	2	1	2	3	5	9	0
100	2	0	0	4	0	0	1	5	2	0	2	2	3	1	5	6	2	0	3	1	3	3	1	1	5	1	2	3	1	0	0	3	0	2	3	4	0	1	1	3	4	6	0
Distance um	1NM-PP1
5	1	1	2	1	3	2	1	1	4	3	5	1	1	1	4	1	1	1	1	1	1	1	1	1	3	1	3	1	1	1	1	1	1	1	1	1	1	1	1	1	1	1
10	7	8	8	4	7	7	5	7	8	5	6	6	7	6	6	8	4	6	8	6	7	7	5	8	5	9	5	6	4	7	6	5	6	2	3	4	4	7	3	6	5	7
15	6	7	9	4	8	11	5	9	9	6	5	8	7	6	5	8	8	11	9	6	7	9	7	10	10	10	6	9	5	8	5	9	6	4	7	5	7	6	3	9	5	9
20	6	6	7	4	9	12	6	10	7	7	6	10	9	4	7	7	7	13	10	7	9	9	7	10	9	8	7	10	7	6	7	9	8	4	10	4	8	7	5	8	4	9
25	4	5	5	4	8	5	7	10	5	7	5	10	7	4	8	8	6	14	8	9	8	8	7	10	8	9	5	7	6	7	8	5	8	4	7	5	10	5	4	5	6	9
30	4	4	3	4	8	3	8	8	4	5	3	11	6	3	7	7	8	11	7	9	8	7	7	6	8	8	6	5	5	6	7	2	9	3	7	5	8	3	4	6	5	9
35	3	4	3	4	6	3	7	7	4	5	3	9	2	4	8	7	6	9	3	9	7	6	7	5	6	9	6	5	4	7	5	2	8	5	8	4	4	3	4	4	4	9
40	4	4	3	4	4	2	6	6	4	5	3	4	1	4	8	5	6	8	3	5	6	3	7	5	6	8	6	5	4	7	5	3	7	5	8	4	4	3	4	4	3	6
45	4	4	3	4	4	2	6	6	4	5	2	4	1	5	8	6	4	5	4	6	5	2	5	5	4	7	6	5	3	6	4	2	6	3	5	4	4	3	4	3	3	5
50	4	4	2	4	3	2	6	6	4	3	3	4	1	5	8	6	4	5	4	4	2	3	3	4	4	5	5	5	3	7	3	2	4	5	4	4	3	3	4	2	3	4
55	4	4	2	4	2	2	4	7	3	3	3	4	1	5	6	7	6	4	4	3	2	3	3	3	3	5	7	5	3	7	2	3	4	4	5	5	2	1	3	2	4	3
60	4	5	2	4	2	2	3	7	3	3	3	4	1	5	5	6	5	5	3	3	3	3	5	3	5	5	6	5	4	5	2	3	4	2	5	5	3	2	3	3	4	3
65	3	5	2	4	2	2	3	5	3	2	2	4	1	5	5	5	4	4	2	4	3	2	3	3	4	5	5	3	4	4	2	3	2	2	4	4	3	3	2	2	3	3
70	2	5	2	3	2	2	3	5	3	2	2	4	1	5	4	5	4	4	2	4	3	2	2	3	4	4	4	3	6	3	2	3	2	1	2	4	4	3	3	2	3	2
75	2	3	1	4	2	2	2	4	3	2	3	4	1	5	4	5	4	3	2	4	2	2	1	3	4	4	4	1	5	3	2	3	2	0	1	6	4	2	1	2	3	3
80	2	4	1	4	2	2	1	4	3	2	2	4	1	6	4	5	5	3	2	3	2	2	1	3	4	4	5	1	4	2	2	2	2	0	1	5	4	3	1	2	3	3
85	2	4	1	4	2	2	1	4	3	2	1	3	1	4	3	7	4	3	3	3	2	1	1	5	3	4	5	1	5	2	2	2	2	0	2	3	3	2	1	1	3	3
90	1	3	0	2	2	2	0	4	3	2	1	3	1	4	3	6	5	2	2	2	1	1	1	4	2	3	5	2	3	1	3	2	3	0	1	3	2	2	1	1	1	3
95	0	2	0	2	2	3	0	5	2	2	1	2	0	4	3	5	3	1	3	1	1	0	1	2	1	3	6	2	4	1	2	2	3	0	1	2	3	2	1	1	2	3
100	0	2	0	1	2	2	0	5	2	2	2	2	0	4	3	4	3	0	3	1	0	0	1	2	1	2	5	2	2	1	1	3	4	0	1	1	3	2	1	1	0	3
Distance um	1NM-PP1+BDNF
5	1	1	3	1	3	3	1	1	1	1	2	2	2	3	2	1	1	2	1	1	2	1	1	1	1	1	3	1	1	1	1	1	1	3	1	1	1	1	1	1	1	1	1
10	7	6	6	7	7	9	9	2	5	4	3	4	2	8	5	6	6	4	7	6	6	8	8	6	7	4	7	7	3	9	4	3	10	6	7	5	6	4	4	5	6	3	5
15	8	6	7	11	8	8	10	2	7	5	2	7	2	8	5	7	9	6	7	6	6	8	10	8	10	6	7	10	3	9	6	3	9	5	8	5	6	4	5	8	5	8	6
20	4	7	5	7	7	8	9	2	7	5	3	8	2	8	6	8	12	8	8	7	7	10	8	8	10	7	8	12	3	9	9	6	11	6	7	7	6	5	5	9	5	8	5
25	3	6	3	6	5	7	5	3	6	6	4	8	3	8	6	7	11	9	7	8	7	8	7	8	7	9	10	10	4	10	7	7	9	8	8	7	7	6	7	7	7	8	6
30	2	6	2	4	4	6	5	4	4	4	3	5	4	5	7	7	11	9	5	9	9	9	5	6	6	8	9	11	7	9	5	7	6	9	5	6	7	8	8	8	8	6	6
35	2	3	4	4	4	4	5	4	4	4	5	6	6	5	6	6	11	6	5	8	10	7	5	6	7	11	9	11	6	10	6	5	6	8	7	6	6	8	9	6	6	7	5
40	2	3	4	3	3	2	5	4	5	4	4	6	7	4	8	5	8	5	5	10	10	6	6	5	8	8	8	8	5	9	6	5	6	9	5	5	7	7	6	5	5	6	4
45	2	4	4	4	4	1	5	4	5	4	4	5	7	2	7	4	7	4	6	9	10	5	5	6	8	8	7	8	5	7	5	6	5	11	5	4	7	6	7	4	5	5	4
50	3	5	4	3	4	1	5	4	6	3	4	5	7	2	7	5	4	3	4	9	9	7	5	7	8	8	7	5	4	5	4	6	6	9	4	4	5	5	9	4	5	3	3
55	3	5	4	3	4	2	4	5	5	2	3	3	7	1	8	5	3	3	3	8	10	7	3	6	7	8	6	4	5	2	3	6	5	7	4	4	4	5	6	3	5	3	3
60	3	4	3	1	1	2	3	3	3	2	3	3	7	1	8	5	3	2	1	8	9	4	3	6	7	8	4	2	5	2	2	5	4	5	5	3	4	5	5	2	5	3	3
65	2	3	3	2	0	3	3	3	1	2	3	3	5	1	9	4	3	4	1	8	9	2	2	6	6	8	5	1	4	2	2	3	4	4	4	1	4	3	3	1	3	3	3
70	2	3	5	0	0	3	1	3	1	2	3	2	6	1	8	3	3	2	2	7	8	1	1	6	5	9	4	1	3	3	3	3	3	3	4	1	4	3	2	1	3	3	3
75	2	3	5	0	0	4	1	3	0	4	2	2	5	1	7	2	3	2	2	7	7	0	1	6	6	9	4	1	2	3	3	3	4	1	3	1	3	1	1	2	4	3	3
80	2	3	5	0	0	5	0	3	0	1	2	2	5	1	5	2	3	2	2	6	7	0	1	6	6	7	5	1	2	1	4	3	2	1	3	1	4	0	1	2	4	4	3
85	2	3	4	0	0	4	0	3	0	1	2	1	5	1	4	1	3	2	2	6	4	0	1	5	6	7	5	1	2	2	4	4	3	0	1	1	3	0	1	2	3	3	2
90	3	3	2	0	0	4	0	2	0	1	2	2	4	1	2	1	4	1	2	6	5	0	1	5	5	7	5	1	2	3	3	4	2	0	1	1	4	0	0	2	3	4	1
95	3	2	2	0	0	3	0	1	0	1	2	1	4	1	2	2	3	1	2	4	4	0	1	3	5	7	6	1	2	2	1	4	1	0	1	1	4	0	0	3	2	1	1
100	3	1	2	0	1	3	0	0	0	1	2	1	5	1	3	2	2	1	2	3	2	0	1	4	4	5	6	1	1	2	0	2	1	0	1	1	4	0	0	2	1	0	1
