# Supplementary material for: BDNF/TrkB signaling endosomes in axons coordinate CREB/mTOR activation and protein synthesis in the cell body to induce dendritic growth in cortical neurons
Source: eLife. 2023 Feb 24;12:e77455. doi: 10.7554/eLife.77455 (PMC9977295; doi:10.7554/eLife.77455)
Supplement: Figure 2—source data 1. [file elife-77455-fig2-data1.xlsx]

## Sheet: Figure 2 B
Branching points
	P75 wt		P75 het		p75 Ko
	Control	BDNF	Control	BDNF	Control	BDNF
	5	19	3	4	0	2
	5	13	4	5	2	9
	4	9	3	6	1	6
	4	11	3	8	1	6
	8	9	4	7	1	3
	4	16	5	8	1	6
	10	3	2	6	6	10
	5	5	7	9	3	2
	5	24	6	7	4	6
	7	11	1	5	5	6
	9	15	5	7	7	5
	6	13	10	7	4	6
	6	6	2	5	2	4
	7	6	2	4	1	11
	7	7	4	6	11	7
	7	9	5	5	4	6
	9	4	11	15	3	10
	6	3	5	15	6	17
	15	1	9	9	7	9
	7	8	5	11	11	8
	6	18	4	12	4	24
	9	9	3	15	5	18
	4	8	7	9	4	12
	4	5	8	8	5	13
	6	13	4	17	4	4
	4	8	14	13	5	14
	5	7	9	14	10	9
	3	5	5	10	6	13
	7	8	2	7	7	14
	3	5	3	4	9	18
	4	8	2	6	3	11
	5	9	4	6	5	8
	3	4	5	3	5	9
	3	9	3	9	3	8
	3	5	3	7	3	6
	2	10	5	4	4	9
	6	11	2	9	8	6
	3	9			9	11
	5	11			4	11
	4	5			7	14
	5	6			3	6
	5	8				6
	8					10
						7
						18
						11
						16
Average	5.65116	8.88095	4.83784	8.16216	4.70732	9.46809
Standard Dev	2.40915	4.62866	2.86273	3.62486	2.77708	4.70823
Standard Error	0.367391	0.714218	0.470629	0.595924	0.433708	0.686766

## Sheet: Figure 2C
	Number of primary dendrite
	P75 wt		P75 het		p75 Ko
	Control	BDNF	Control	BDNF	Control	BDNF
	9	16	3	5	4	5
	6	16	3	5	4	8
	4	8	5	3	3	7
	6	15	5	5	5	7
	7	6	3	8	4	5
	8	11	5	7	3	7
	7	8	4	5	5	9
	8	9	4	4	5	5
	6	12	4	6	5	4
	8	6	3	3	5	7
	10	7	4	5	3	5
	9	5	4	3	7	9
	7	10	4	6	5	4
	11	8	3	3	5	8
	8	8	4	5	7	8
	4	7	9	6	5	6
	5	5	4	7	5	8
	4	6	5	11	6	4
	5	6	5	7	4	8
	6	8	4	7	3	6
	7	6	5	10	5	7
	5	7	4	9	5	10
	9	7	5	6	7	9
	5	6	6	8	6	9
	4	7	7	4	6	5
	4	5	6	4	4	9
	5	6	3	11	3	8
	4	9	4	8	5	5
	7	6	5	9	5	6
	4	6	7	5	7	8
	3	5	8	5	6	6
	6	10	4	7	5	7
	6	8	7	6	3	4
	5	5	6	10	6	6
	5	9	6	8	6	7
	6	9	5	5	5	5
	4	8	6	9	8	5
	6	7			4	7
	4	6			5	9
	4	6			5	8
	6	7			4	5
	6	8				5
		8				8
						5
						11
						8
						7
Average	6.02381	7.86047	4.83784	6.35135	4.95122	6.78723
Standard Dev	1.88043	2.71312	1.46275	2.25113	1.24401	1.75618
Standard Error	0.290156	0.413747	0.240475	0.370083	0.194282	0.256166

## Sheet: Figure 2D
Sholl
Distance um	Control p75 WT
5	1	2	3	3	2	5	1	4	4	4	3	3	4	3	1	3	4	1	1	1	1	1	2	2	3	1	5	1	1	2	5	2	3	4	5	3	4	4	5	3	2	3	1	4	1	4	1	7	4
10	8	4	3	2	6	5	5	7	5	5	4	5	4	4	9	6	4	7	9	7	8	7	7	7	10	8	9	8	9	4	6	4	5	5	8	8	10	6	4	5	8	7	7	7	9	7	12	11	7
15	7	5	4	2	9	3	6	9	6	6	6	5	8	5	11	7	4	6	12	7	12	7	9	11	16	13	8	13	9	4	6	5	5	8	8	9	8	6	11	6	9	11	7	10	10	9	14	11	8
20	6	7	3	4	9	2	5	6	2	7	4	6	7	6	12	9	5	7	11	10	15	12	8	11	14	11	9	12	8	5	6	5	5	8	9	9	8	5	12	8	10	10	7	12	10	9	13	10	7
25	6	6	4	4	6	2	3	3	2	4	5	5	6	5	10	7	5	7	12	10	13	12	8	13	11	10	9	14	6	5	6	7	5	7	8	7	8	7	11	9	11	8	7	12	8	7	10	10	6
30	5	5	3	4	5	1	3	2	2	4	4	5	4	7	11	8	5	5	10	8	11	7	7	13	11	9	8	10	6	8	7	7	5	8	7	7	8	8	7	9	9	6	6	12	9	6	6	8	4
35	3	3	3	7	1	1	2	0	2	4	4	5	5	5	7	5	6	6	8	6	11	5	8	9	13	8	6	8	7	7	5	7	6	8	9	7	7	6	5	6	7	5	7	9	10	5	6	7	6
40	2	2	3	5	0	3	3	0	1	4	2	3	3	5	6	6	5	5	8	6	9	4	7	9	13	7	6	7	5	7	6	7	4	9	7	5	8	4	5	6	3	6	7	8	7	4	6	4	6
45	1	2	4	3	0	2	2	0	1	4	2	2	4	5	5	6	7	4	7	5	5	4	8	10	8	8	5	7	5	4	8	5	3	8	5	5	9	4	5	4	4	4	7	7	3	4	3	3	7
50	1	3	4	3	0	2	1	0	1	2	2	2	4	3	5	5	5	4	7	5	5	4	5	9	5	5	5	6	6	3	7	3	3	5	4	3	8	4	4	2	3	5	7	7	3	3	3	3	4
55	2	2	4	1	0	2	1	0	1	1	2	4	4	4	4	5	3	4	7	4	4	4	5	7	5	4	4	4	6	5	8	2	2	5	3	3	6	3	4	2	3	4	8	8	3	2	3	3	4
60	2	0	4	3	0	1	0	0	1	0	2	2	2	3	3	4	2	4	7	3	2	3	5	4	9	2	4	4	5	5	6	1	2	6	4	3	7	3	4	2	3	3	6	7	2	1	2	3	3
65	3	0	6	1	0	1	0	0	1	0	1	1	2	1	3	3	2	5	5	2	2	3	3	4	6	1	5	4	5	4	6	1	2	6	3	4	6	2	4	2	2	3	4	4	2	1	2	3	1
70	3	0	3	0	0	0	0	0	1	0	1	1	3	0	2	3	2	3	2	2	2	3	3	3	6	1	4	4	5	3	6	1	2	6	2	3	4	2	3	2	2	3	3	3	2	1	1	3	1
75	3	0	3	0	0	0	0	0	1	0	1	0	1	0	2	1	2	2	1	2	2	3	2	3	5	1	3	4	4	3	6	0	2	6	2	2	4	1	3	2	2	2	3	2	1	1	1	2	0
80	3	0	2	0	0	0	0	0	1	0	1	0	0	0	2	1	1	2	1	2	2	2	2	3	5	1	3	4	3	3	2	0	2	5	2	3	3	1	3	3	2	1	3	2	1	1	1	1	0
85	3	0	1	0	0	0	0	0	1	0	0	0	0	0	3	1	1	2	1	2	2	2	2	3	5	1	3	5	3	3	2	0	2	5	4	3	2	1	3	3	2	1	3	1	1	1	0	0	0
90	2	0	1	0	0	0	0	0	1	0	0	0	0	0	1	0	1	2	1	2	2	2	2	3	4	2	4	5	3	3	1	0	2	2	3	3	2	0	2	3	0	0	0	1	1	1	0	0	0
95	0	0	1	0	0	0	0	0	1	0	0	0	0	0	1	0	1	2	0	2	2	2	1	3	4	2	0	2	2	3	1	0	1	2	7	2	2	0	2	2	0	0	0	1	1	1	0	0	0
100	0	0	1	0	0	0	0	0	0	0	0	0	0	0	1	0	1	2	0	2	2	2	1	2	3	2	0	2	2	2	1	0	1	1	5	2	0	0	2	2	0	0	0	0	1	1	0	0	0
Distance um	Control p75 HET
5	3	4	2	3	4	3	6	4	6	3	3	2	4	3	3	3	3	2	3	2	1	3	3	4	1	3	1	3	2	3	1	1	1	3	3	2	2
10	4	3	5	6	3	5	4	4	4	3	5	4	4	3	4	3	5	5	5	5	4	5	6	5	5	13	4	6	5	4	5	4	6	5	8	6	3
15	4	3	5	8	5	8	4	6	3	3	6	6	5	4	4	6	5	9	5	6	7	8	8	5	7	11	4	7	6	4	6	4	5	6	8	5	3
20	4	3	5	8	5	7	4	5	4	3	6	7	5	4	3	7	4	8	7	5	7	8	8	6	7	13	5	7	5	6	8	3	6	9	8	5	5
25	2	5	6	4	6	4	3	5	5	3	4	7	4	5	4	6	3	7	5	4	8	7	6	7	7	12	5	7	9	6	8	4	6	9	9	8	5
30	2	5	6	3	3	3	4	3	4	4	4	9	4	5	6	5	3	7	6	3	6	5	4	6	8	12	8	7	10	6	9	5	7	10	8	10	7
35	3	5	6	3	3	2	2	3	5	3	4	11	3	4	5	5	3	4	5	2	7	5	4	5	6	11	8	7	7	6	8	5	8	10	6	9	8
40	3	6	6	3	4	2	1	3	7	3	3	7	1	4	5	3	1	5	4	2	7	2	2	5	4	9	10	6	8	6	6	5	8	9	4	7	6
45	3	5	5	3	4	2	1	2	7	3	3	5	2	4	5	4	1	4	5	2	7	2	3	5	3	9	10	3	8	6	5	4	8	9	4	5	5
50	3	3	5	2	3	2	1	2	4	3	3	4	2	4	6	3	1	4	3	2	6	3	3	2	2	7	5	4	7	7	5	4	8	9	4	7	4
55	3	2	4	2	2	2	1	2	3	2	4	4	2	5	4	3	1	3	3	2	3	2	3	0	1	5	5	5	6	6	4	3	7	6	2	10	4
60	1	2	2	2	2	2	0	2	3	1	4	4	2	4	2	3	1	2	2	1	3	4	3	0	1	5	6	4	6	6	2	4	7	5	3	4	4
65	1	2	2	2	1	3	0	2	3	1	3	4	1	4	2	3	1	2	2	1	2	5	1	0	0	7	4	3	7	6	2	3	7	4	3	5	4
70	1	1	2	2	1	3	0	2	1	1	2	1	0	4	2	3	1	1	1	1	2	4	1	0	0	7	3	3	8	4	2	3	7	2	2	6	2
75	1	0	2	0	1	2	0	3	1	0	2	2	0	4	1	2	1	1	0	1	2	2	1	0	0	6	3	2	7	3	2	3	6	1	2	6	2
80	0	0	1	0	0	2	0	4	1	0	2	1	0	3	1	2	1	1	0	0	1	1	0	0	0	5	3	1	5	3	2	3	6	1	1	4	3
85	0	0	0	0	0	1	0	1	2	0	1	1	0	3	1	2	1	1	0	0	1	1	0	0	0	5	3	1	2	2	1	1	6	2	0	3	3
90	0	0	0	0	0	0	0	1	2	0	1	1	0	3	0	1	1	0	0	0	2	1	0	0	0	5	2	2	1	2	1	0	3	2	0	3	2
95	0	0	0	0	0	0	0	3	2	0	0	1	0	3	0	1	0	0	0	0	1	0	0	0	0	4	2	2	1	1	0	0	2	2	0	4	3
100	0	0	0	0	0	0	0	1	2	0	0	0	0	2	0	0	0	0	0	0	0	0	0	0	0	4	2	1	1	1	0	0	1	1	0	3	4
Distance um	Control p75 KO
5	1	1	1	1	1	1	1	1	1	1	1	1	1	1	1	1	1	1	4	2	2	1	1	4	2	5	3	2	1	1	4	4	2	3	3	3	2	6	3	4	3
10	4	4	2	5	4	3	4	3	4	3	3	3	5	4	4	5	6	6	5	3	4	5	7	7	5	5	3	5	6	8	5	5	3	6	6	5	8	4	6	5	5
15	4	4	3	6	3	3	4	6	6	5	3	9	5	6	9	5	5	6	6	4	7	5	8	7	6	5	5	6	7	12	7	6	4	7	6	7	10	3	6	7	4
20	4	5	3	6	3	4	6	5	7	5	4	8	5	5	8	5	6	6	7	4	6	5	8	7	5	6	5	7	7	10	7	6	6	6	7	6	11	4	6	10	3
25	4	5	3	6	5	4	6	5	6	6	4	9	5	6	8	5	4	7	8	5	7	5	9	8	7	5	5	4	6	14	8	6	6	7	9	5	11	4	7	7	3
30	4	4	3	6	5	4	8	5	6	8	4	9	5	5	8	7	3	7	8	6	7	9	7	7	8	6	7	4	6	10	7	5	4	7	6	6	8	4	7	8	4
35	4	4	3	6	5	4	5	5	6	8	5	8	6	5	7	7	4	7	6	5	6	6	5	6	6	7	7	5	8	10	6	5	4	7	4	6	8	4	7	8	5
40	3	4	3	6	5	4	7	7	6	9	6	8	6	4	7	7	5	7	5	11	5	5	4	5	5	5	8	4	7	9	6	5	3	8	4	5	7	5	8	9	4
45	2	3	3	6	5	4	8	5	7	8	6	8	6	3	7	6	4	7	3	11	4	4	4	5	5	5	8	4	7	6	6	5	3	8	4	6	5	5	6	10	4
50	2	3	2	5	5	3	6	5	8	7	6	8	7	2	7	6	4	8	3	11	5	4	3	5	5	5	7	4	7	6	5	4	2	7	4	6	7	5	6	6	2
55	2	3	2	4	5	3	6	5	8	8	5	8	6	1	6	7	4	9	2	8	4	3	2	5	6	4	8	3	6	7	5	3	2	7	3	6	7	5	6	7	2
60	2	3	2	4	4	3	5	5	8	7	6	8	4	1	6	8	4	9	2	4	4	3	1	3	6	4	7	5	6	5	5	2	2	6	2	5	7	5	5	6	2
65	1	2	3	3	3	3	5	4	3	7	7	8	4	1	6	8	3	8	2	2	3	4	1	4	6	4	3	6	5	4	5	2	2	4	2	4	5	4	3	8	2
70	0	0	3	3	3	3	4	3	3	6	6	8	4	1	6	8	3	5	1	2	3	2	1	5	6	3	1	4	4	3	5	1	2	4	1	3	3	8	2	6	2
75	0	0	3	2	2	2	4	3	2	5	7	8	3	1	5	8	3	5	0	1	3	2	1	3	6	3	1	4	4	3	4	1	2	6	2	3	3	7	2	5	1
80	0	0	3	2	2	2	3	3	2	4	5	7	3	1	6	7	3	6	0	1	2	2	1	2	5	3	0	3	2	3	3	1	2	3	2	3	3	7	1	4	2
85	0	0	2	1	2	1	1	2	1	2	4	6	2	0	6	7	2	6	0	1	2	1	1	3	6	3	0	3	1	1	3	1	2	3	3	2	2	6	1	2	2
90	0	0	1	1	2	0	2	2	1	2	4	5	0	0	6	5	2	4	0	0	3	1	2	2	4	3	0	2	1	0	3	1	3	1	1	2	1	5	1	2	2
95	0	0	1	1	2	0	2	1	0	1	3	5	0	0	3	5	2	2	0	0	3	1	1	1	3	2	0	2	1	0	2	1	2	1	1	2	1	4	2	2	2
100	0	0	1	1	2	0	1	0	0	1	3	5	0	0	3	4	2	1	0	0	4	1	1	1	2	2	0	2	1	0	2	1	1	0	1	2	2	3	1	1	1
[truncated: 1 more columns]

## Sheet: Figure 2E
Sholl
Distance um	BDNF p75 WT
5	7	4	5	3	1	1	2	1	2	1	1	2	1	2	2	1	2	1	1	1	1	1	2	2	2	1	1	4	1	3
10	6	7	10	7	4	6	6	8	3	7	6	7	16	3	6	9	10	8	8	5	5	9	6	4	4	6	6	4	4	6
15	6	7	10	7	10	17	11	14	6	11	7	9	17	6	8	8	11	8	10	7	4	15	7	5	8	7	7	13	6	9
20	8	9	8	9	16	16	11	19	7	12	9	8	20	9	10	8	13	8	12	7	6	14	9	6	8	12	6	12	7	8
25	8	9	5	6	17	15	14	17	6	10	8	8	23	10	9	10	14	5	11	6	7	13	8	6	10	10	4	9	6	7
30	8	7	4	7	13	11	13	16	8	12	8	7	19	11	7	8	13	6	10	8	4	13	10	5	9	5	4	6	6	7
35	8	7	5	7	12	12	11	13	9	9	7	7	20	9	11	7	9	6	9	8	2	7	6	6	10	3	4	3	7	6
40	6	6	3	5	10	11	9	10	9	7	5	7	18	9	11	4	10	6	8	8	2	3	6	6	8	4	3	3	7	3
45	3	5	3	4	12	11	8	9	8	5	6	7	16	6	10	2	6	5	9	7	2	2	4	4	9	3	3	3	6	2
50	3	3	3	2	10	14	8	8	9	5	5	8	15	4	9	2	9	5	6	5	2	1	4	2	5	3	2	2	6	2
55	3	3	3	2	7	14	8	5	10	5	4	7	17	4	7	2	6	5	6	5	1	0	3	1	2	1	2	2	4	2
60	3	3	3	2	6	15	6	5	10	5	4	4	14	4	7	2	5	3	6	2	1	0	3	0	2	1	2	1	3	4
65	3	3	2	1	6	14	7	5	8	7	2	4	13	4	5	2	5	3	6	1	1	0	3	0	1	1	2	0	2	4
70	3	2	2	1	7	13	6	5	6	7	3	3	11	4	4	2	4	1	2	1	0	0	4	0	2	1	2	0	1	5
75	3	2	2	1	7	13	7	5	7	7	1	3	8	2	4	3	4	2	1	0	0	0	2	0	2	1	2	0	2	4
80	2	1	2	1	7	9	3	4	7	7	1	2	9	2	4	3	2	1	1	0	0	0	1	0	1	1	1	0	1	4
85	2	1	2	1	6	9	3	4	3	9	1	2	7	3	3	3	1	1	1	0	0	0	1	0	1	1	1	0	2	2
90	1	1	3	1	5	7	2	6	0	5	1	1	7	3	1	3	1	1	1	0	0	0	1	0	0	1	1	0	1	1
95	0	0	3	1	3	6	0	6	0	4	1	2	4	3	2	3	1	1	0	0	0	0	0	0	0	0	0	0	1	0
100	0	0	2	1	1	4	0	6	0	5	1	2	4	2	2	4	1	1	0	0	0	0	0	0	0		0	0	0	0
Distance um	BDNF p75 HET
5	1	1	1	1	1	2	1	1	2	1	2	1	1	4	1	1	1	3	1	1	4	1	3	6	2	2	2	1	2	3	2	2	1	3	3	2	5
10	4	6	4	7	4	3	6	4	4	7	5	9	8	10	10	14	10	6	10	3	5	9	6	6	3	5	8	8	5	4	7	4	4	3	3	3	5
15	5	7	6	5	7	6	11	7	5	12	6	10	15	13	13	16	12	9	11	5	6	12	5	6	3	7	9	8	6	7	7	4	7	3	6	3	8
20	8	8	6	6	8	7	13	9	6	13	5	11	17	11	14	14	12	12	15	11	8	13	8	6	4	8	11	10	8	9	7	6	8	4	7	5	8
25	9	7	5	6	9	7	12	11	5	13	5	8	19	9	11	12	12	13	10	10	7	16	7	7	4	8	9	11	9	8	9	6	8	4	7	6	8
30	6	7	6	7	9	6	12	12	5	11	8	8	17	8	11	12	11	9	8	9	9	13	6	9	3	8	9	10	8	5	8	4	8	5	6	5	8
35	7	7	5	6	11	5	10	10	4	11	9	4	18	6	9	10	8	10	8	7	9	12	5	9	3	6	6	9	8	9	7	4	7	7	5	4	5
40	7	7	4	8	7	4	7	7	2	10	7	4	17	5	7	12	9	7	7	9	8	14	5	8	3	5	5	12	7	7	7	3	7	7	4	4	3
45	6	6	3	6	7	2	6	7	2	7	7	2	11	5	6	11	7	6	5	11	8	11	4	6	4	5	8	10	6	5	5	1	5	7	3	4	2
50	5	7	2	5	6	2	4	1	1	5	7	3	9	4	6	11	9	4	4	12	7	10	4	3	5	5	5	9	6	5	4	1	4	5	4	3	2
55	5	7	1	4	3	0	2	1	1	1	7	4	7	5	4	9	7	3	4	10	8	10	4	2	5	3	6	8	6	4	3	1	3	7	5	2	1
60	5	6	1	4	2	0	1	0	2	0	7	4	5	3	4	8	6	2	4	8	7	10	4	1	4	2	3	7	5	3	2	1	4	5	3	1	1
65	4	5	0	3	1	0	1	0	1	0	6	3	4	3	4	5	6	1	3	6	5	10	2	1	2	1	2	4	4	1	2	1	3	4	2	1	1
70	3	7	0	1	0	0	0	0	1	0	4	3	4	2	3	4	5	1	2	6	4	9	2	1	2	1	1	2	2	1	1	1	4	3	2	1	1
75	3	3	0	1	0	0	0	0	0	0	5	3	3	1	2	4	5	1	2	3	2	7	2	1	2	1	1	1	1	2	1	1	3	2	2	1	1
80	1	2	0	0	0	0	0	0	0	0	4	2	2	1	2	2	4	1	1	3	1	4	2	1	4	1	0	1	1	0	1	1	3	2	2	0	0
85	2	2	0	0	0	0	0	0	0	0	3	2	1	1	2	1	1	1	1	1	1	5	1	1	3	1	0	1	1	0	1	1	2	2	1	0	0
90	3	1	0	0	0	0	0	0	0	0	2	1	1	0	2	1	1	0	1	0	1	5	1	0	3	1	0	1	1	0	1	1	1	0	1	0	0
95	3	1	0	0	0	0	0	0	0	0	2	1	0	0	3	1	1	0	1	0	1	2	1	0	2	2	0	1	1	0	1	1	0	0	1	0	0
100	1	0	0	0	0	0	0	0	0	0	1	1	0	0	3	0	1	0	1	0	1	2	0	0	2	2	0	1	1	0	1	3	0	0	1	0	0
Distance um	BDNF p75 KO
5	1	1	1	1	6	1	1	1	1	1	1	1	1	1	1	1	2	1	5	2	3	4	2	4	3	3	3	3	2	1	1	1	1	7	1	2	3	2	2	2	3	4	2	3	3	5	3
10	2	4	6	7	6	5	7	4	4	6	3	7	2	4	9	5	4	6	8	5	9	10	8	11	6	6	9	5	5	7	4	6	5	7	7	7	5	9	11	7	5	4	10	6	11	6	7
15	4	5	7	8	7	8	10	5	5	8	4	9	4	6	9	6	7	8	10	8	9	11	11	8	6	6	12	6	9	10	6	7	6	10	9	7	6	9	11	13	6	5	11	6	13	8	9
20	4	7	11	8	8	8	11	5	7	10	7	10	4	7	11	7	15	7	13	8	9	13	10	9	6	10	11	7	12	11	5	10	8	8	10	7	8	9	10	11	7	6	9	6	13	10	7
25	6	9	11	7	6	9	10	6	7	11	7	10	4	8	10	7	13	10	8	9	12	15	10	8	6	14	11	8	12	11	8	7	8	7	9	7	8	9	8	10	5	7	8	7	13	9	6
30	6	9	11	8	4	6	9	6	7	9	7	12	4	8	11	6	12	8	10	9	10	16	13	9	4	15	9	9	15	13	7	7	7	7	9	7	6	7	9	11	5	5	9	7	12	8	4
35	6	10	12	10	3	5	10	6	7	9	8	13	5	9	10	8	13	9	10	9	12	11	12	7	4	11	10	10	13	10	7	8	5	7	7	7	6	9	8	9	3	5	7	6	11	6	6
40	6	11	10	11	3	5	11	6	7	6	8	12	5	7	10	5	10	8	5	8	12	14	12	5	4	9	11	8	9	9	8	8	5	6	8	8	4	9	5	8	3	5	10	5	10	8	7
45	5	11	10	10	2	5	10	7	8	6	8	11	6	7	9	7	10	8	4	6	14	12	9	5	4	7	11	6	5	7	9	7	6	6	7	9	4	7	3	7	2	4	7	5	8	7	7
50	5	10	10	10	1	4	12	7	7	6	9	9	6	10	9	7	9	9	4	4	10	10	7	5	4	6	9	4	5	8	6	6	3	7	5	8	4	7	3	7	2	4	7	6	5	7	8
55	5	11	8	10	0	3	10	6	7	6	9	10	7	11	9	7	9	7	4	4	11	6	7	3	5	6	8	5	6	5	7	6	3	5	5	6	3	5	3	6	2	4	6	5	6	4	8
60	6	11	7	10	0	2	11	6	7	6	8	9	7	10	9	9	9	7	4	2	8	2	7	3	4	7	8	5	5	5	5	8	2	4	4	8	2	7	4	7	2	3	7	5	4	2	9
65	5	9	8	9	0	2	9	6	7	6	8	6	7	10	8	9	9	6	2	2	6	4	8	6	3	7	8	7	5	5	4	8	2	3	3	7	3	6	5	5	1	2	8	3	3	2	7
70	5	8	8	6	0	2	7	4	7	5	5	5	7	8	6	9	7	6	2	1	8	0	7	5	3	3	8	6	5	6	4	6	1	3	2	6	2	5	4	6	1	3	6	3	2	2	10
75	4	8	7	5	0	2	5	2	7	4	3	5	6	7	7	8	6	6	2	1	2	0	5	3	3	3	3	4	5	6	5	5	1	3	1	5	2	3	4	4	1	3	5	1	2	2	7
80	2	6	7	5	0	2	5	1	6	4	3	5	6	5	7	7	3	6	0	1	2	0	6	3	1	2	4	4	5	5	2	4	0	3	1	3	2	3	4	2	1	2	5	0	2	5	8
85	1	7	6	4	0	1	5	1	4	4	1	4	6	5	7	4	2	5	0	1	1	0	2	1	0	2	3	2	3	3	2	4	0	2	1	3	1	3	5	3	1	1	5	0	1	2	6
90	1	8	6	2	0	2	4	1	4	4	1	4	5	3	6	4	2	3	0	1	1	0	2	1	0	2	2	1	3	2	1	3	0	2	1	2	1	4	5	2	1	2	2	0	1	2	4
95	1	6	5	1	0	2	4	1	4	3	1	4	4	3	4	1	1	3	0	1	0	0	2	1	0	1	1	1	2	2	0	1	0	2	1	1	0	4	4	0	1	0	2	0	1	0	3
100	1	5	5	0	0	2	3	1	3	2	1	3	3	4	2	1	0	2	0	1	0	0	1	1	0	1	1	1	2	2	0	0	0	1	1	1	0	3	0	0	1	0	1	0	0	0	2
