# Supplementary material for: BDNF/TrkB signaling endosomes in axons coordinate CREB/mTOR activation and protein synthesis in the cell body to induce dendritic growth in cortical neurons
Source: eLife. 2023 Feb 24;12:e77455. doi: 10.7554/eLife.77455 (PMC9977295; doi:10.7554/eLife.77455)
Supplement: Figure 3—figure supplement 1—source data 1. — Graph B’s raw data. [file elife-77455-fig3-figsupp1-data1.xlsx]

## Sheet: GraphB
pCREB levels
	P75 wt		P75 het		P75 Ko
	Control	BDNF	Control	BDNF	Control	BDNF
	0.73	2.722	1.12608	1.6136	1.53796	1.47091
	0.68	2.94026	1.54331	2.19744	1.41814	1.69853
	0.67	2.11397	0.741238	1.8079	0.874745	1.71015
	0.7	2.71056	1.36747	2.54106	1.80075	1.89871
	0.86	3.11064	1.41285	2.47443	0.540591	1.33713
	0.58	2.2021	0.691451	1.85173	0.427903	2.48891
	0.88	2.70472	0.92607	1.85753	0.872775	1.94436
	1.24	2.00011	0.571921	2.22875	0.864906	2.14003
	0.73	1.95324	1.46597	1.91624	0.749789	1.42746
	1.63	1.72493	0.826068	2.21723	1.21437	1.44042
	0.74	2.01811	0.443198	1.87346	1.04884	1.82671
	0.84	2.338	1.50913	1.3595	0.832468	1.55321
	1.36	1.73148	1.22795	1.83687	0.578349	1.19542
	1.68	2.82281	0.823954	1.68061	1.28235	1.33193
	1.48	2.08174	1.29927	3.2469	1.65438	1.94255
	0.55	3.27704	0.868144	1.96122	1.64013	2.30838
	0.89	3.25506	0.755812	1.92794	0.864157	1.30102
	1.79	1.42964	1.01921	2.4249	0.772057	1.75748
	1.56	2.81728	0.799136	2.46397	0.758642	1.45937
	0.68	1.99771	0.960807	2.67776	0.622403	1.6967
	0.92	1.82109	0.914708	2.82467	0.984092	1.13
	1.54	2.20785	0.999325	2.00381	0.528643	1.86
	0.64	2.37403	0.994417	3.21372	0.853259	1.8
	0.63	2.18109	1.02828	2.19461	1.2783	1.24
	1.01	1.94085	0.684234	1.95584	0.77	1.63
	0.93	2.3	1.45	1.74934	1.14	1.22
	1.29	1.76	1.08	2.11918	0.8	2.04
	0.99	2.19	0.64	2.47	1.03	2.44
	0.79	2.31	0.54	2.33	0.97	2.22
	1.14	1.95	0.78	1.49	0.54	2.38
			0.44	1.49	0.72	3.12
			0.82	2.14
			1.11	1.59
Average	1.005	2.29954	0.965455	2.11304	0.966774	1.7745
Standard Dev	0.371342	0.480074	0.311291	0.45926	0.360146	0.46065
Standard Error	0.0677975	0.0876492	0.0541889	0.0799469	0.0646842	0.0827351
