# Supplementary material for: BDNF/TrkB signaling endosomes in axons coordinate CREB/mTOR activation and protein synthesis in the cell body to induce dendritic growth in cortical neurons
Source: eLife. 2023 Feb 24;12:e77455. doi: 10.7554/eLife.77455 (PMC9977295; doi:10.7554/eLife.77455)
Supplement: Figure 3—figure supplement 2—source data 1. — Graph B´s raw data. [file elife-77455-fig3-figsupp2-data1.xlsx]

## Sheet: Graph B
Tunel levels		Average per experiment
	DMSO	KG501	Oligomycin
	15.3846	13.8461	51.6129
	10.6383	22.3881	46.25
	22.5806	14.0845	88.2353
Average	16.2012	16.7729	62.0327
Standard Dev	6.0129	4.86433	22.85
Standard Error	3.47155	2.80842	13.1924
