# Supplementary material for: BDNF/TrkB signaling endosomes in axons coordinate CREB/mTOR activation and protein synthesis in the cell body to induce dendritic growth in cortical neurons
Source: eLife. 2023 Feb 24;12:e77455. doi: 10.7554/eLife.77455 (PMC9977295; doi:10.7554/eLife.77455)
Supplement: Figure 3—figure supplement 3—source data 1. — Graph D-G´s raw data. [file elife-77455-fig3-figsupp3-data1.xlsx]

## Sheet: Graph D
Size of cell bodies
	Width		Length
	GFP	CREB-DN	GFP	CREB-DN
	16.683	9.189	17.844	11.21
	13.191	12.49	19.636	16.81
	15.784	7.626	18.633	10.541
	13.051	10.317	16.504	11.385
	17.284	13.717	19.507	10.668
	17.99	13.029	17.868	10.718
	17.198	12.091	22.322	12.756
	14.303	11.843	18.541	9.66
	16.907	10.915	20.176	12.234
	17.063	11.015	17.692	15.819
	16.151	10.154	14.323	12.402
	13.471	11.566	19.324	10.18
	14.297	11.095	19.867	10.95
	14.797	11.078	14.25	12.608
	16.566	12.99	21.498	12.46
	17.419	9.936	21.28	11.925
	17.318	15.25	20.465	16.61
	14.055	15.19	16.424	17.91
	17.23	14.71	18.91	19.5
	14.46	14.1	18.23	15.27
	15.33	11.77	17.97	16.25
	14.28	17.06	22	18.3
	11.89	11.31	22.19	14.29
	17.6	11.07	17.95	13.4
	11.3	14.15	16.66	14.4
	14.18	14.57	16.83	16.05
	16.83	13.26	18.95	14.54
	12.37	12.83	16.61	14.68
	18.08	17.73	19.9	15.79
	14.65	13.93	19.72	14.78
	16.11	13.92	19.55	15.93
	11.87	14.93	23.08	17.74
	13.5	14.47	13.59	19.49
	15.16	13.94	18.85	15.46
	13.58	13.06	19.86	14.88
	16.05	15.17	18.87	15.35
	14	15.72	18.97	21.32
	16.83		26.05
	16.76		22.2
	13.87		19.89
	12.9		19.83
	14.58		23.38
	11.04		13.94
	15.82		24.92
	14.28		17.56
Average	15.0684	12.8971	19.1692	14.4396
Standard Dev	1.90459	2.19674	2.68712	2.90656
Standard Error	0.28392	0.361141	0.400572	0.477836

## Sheet: Graph E
Number of primary dendrites
	GFP	CREB-DN
	5	5
	7	5
	8	3
	5	4
	7	4
	8	5
	6	4
	8	6
	5	5
	7	4
	5	5
	5	4
	7	5
	7	3
	4	5
	7	5
	7	4
	6	4
	7	3
	6	4
	5	3
	7	3
	6	4
	6	5
	7	2
	5	3
	6	5
	7	4
	6	5
	6	4
	6	5
	5	3
	4	4
	8	3
	6	4
	6
	5
	6
	7
	7
	7
Average	6.21951	4.11429
Standard Dev	1.06095	0.900047
Standard Error	0.165692	0.152136

## Sheet: Graph F
Diameter of apical dendrite
		EGFP			CREB-DN
distance from soma um	5	25	50	5	25	50
	3.647	2.525	2.244	1.517	0.818	0.444
	1.964	1.823	1.543	1.488	0.992	0.647
	3.063	2.743	2.945	1.788	0.759	0.526
	3.373	2.525	1.788	1.918	1.07	0.769
	3.927	3.098	1.984	2.266	1.774	0.941
	3.366	3.086	2.895	3.657	1.695	1.157
	3.81	2.559	1.905	2.418	1.823	1.464
	3.647	2.525	1.549	1.131	0.853	0.771
	3.81	2.953	2.767	2.163	1.455	1.254
	4.106	2.529	2.136	2.929	1.014	0.71
	2.945	2.388	2.104	2.299	1.672	1.126
	4.003	3.067	3.577	2.713	1.701	1.254
	3.063	3.446	2.373	1.522	1.374	1.359
	1.986	1.672	1.675	1.066	1.747	1.675
	4.984	3.373	3.163	2.96	1.36	1.04
	4.124	3.263	2.429	1.92	1.47	1.06
	3.657	2.698	2.104	2.76	2.08	1.14
	3.927	1.893	2.384	2.42	0.8	0.71
	3.39	2.23	1.86	4.37	1.47	0.56
	3.8	1.77	1.54	4.34	1.04	1.07
	2.29	1.79	1.01	3.73	1.79	1.06
	3.07	1.82	2.02	1.13	1.04	1.02
	3.43	1.27	1.08	1.27	1.11	0.8
	2.09	1.02	1	4.16	1.29	1.06
	1.98	0.91	0.71	2.54	1.13	0.51
	3.79	1.37	1.14	2.01	1.6	0.91
	3.54	2.53	1.79	4.45	2.56	1.28
	3.62	2.02	1.29	4.26	2.28	0
	4.52	2.14	1.82	3.99	1.99	0
	4.57	2.16	1.84	4.8	2.49	1.38
	2.04	1.36	1.29	4.69	1.73	1.17
	3.11	1.62	1.34	2.96	0.9	1
	2.85	1.52	1.44	1.21	0.72	0.66
	1.92	1.07	1.04	1.9	1.44	1.33
	3.21	1.69	1.07	5.73	2.27	0.76
	3.54	1.24	1.04
	4.05	2.04	1.6
	5.8	3.26	2.81
	4.55	2.34	1.31
	2.84	1.69	1.66
	3.02	1.27	0.91
	2.28	1.56	0.76
	2.43	1.21	0.95
	5.38	2.96	1.31
	2.57	1.42	1.17
Average	3.40182	2.12102	1.74144	2.75643	1.46591	0.931914
Standard Dev	0.914532	0.713869	0.68567	1.26589	0.506018	0.375575
Standard Error	0.13633	0.106417	0.102214	0.213975	0.0855326	0.0634837

## Sheet: Graph G
Sholl
Distance um	GFP
5	1	1	3	6	1	6	5	5	2	6	5	6	6	6	5	4	6	6	7	6	4	1	1	2	1	1	2	0	1
15	8	6	5	7	6	6	6	6	6	7	6	7	5	6	4	5	7	7	7	6	4	4	6	5	4	5	8	6	6
25	17	10	2	10	8	7	8	6	7	9	7	7	6	8	8	7	7	7	6	6	6	10	7	9	6	7	9	9	10
35	16	11	2	11	10	7	9	6	7	10	7	10	7	10	9	9	7	7	6	8	6	12	9	10	6	9	11	9	8
45	17	10	2	12	9	11	10	6	7	8	7	11	7	11	7	8	7	7	5	8	6	17	10	10	5	10	10	11	7
55	13	10	2	15	11	10	8	7	6	6	11	10	8	9	11	10	5	7	5	7	8	15	11	12	6	9	10	10	9
65	11	7	2	13	13	10	9	9	7	7	13	8	11	8	10	11	4	6	7	5	7	16	9	6	7	10	11	10	12
75	11	7	2	9	10	8	12	8	7	7	13	8	9	9	9	10	2	5	5	5	7	15	6	7	7	7	11	11	14
85	11	7	2	10	11	7	11	8	7	7	14	6	10	8	11	10	2	3	2	5	3	14	4	7	6	5	14	10	12
95	9	5	2	7	11	4	9	7	7	5	14	6	10	8	10	8	2	3	2	3	3	12	7	5	6	4	11	8	18
105	6	8	3	5	11	5	8	6	8	4	11	4	7	7	10	8	2	2	2	2	3	14	5	6	6	3	10	4	13
115	5	7	4	3	7	5	6	6	8	3	7	3	5	6	9	7	3	2	2	2	3	11	4	3	5	3	8	7	12
125	2	4	3	2	5	6	5	6	6	3	5	3	4	7	8	6	3	2	2	3	3	7	3	3	6	4	5	7	17
135	6	3	5	2	4	6	5	8	5	3	4	3	4	5	10	6	5	2	2	3	2	5	3	3	7	3	6	4	14
145	3	3	4	2	5	6	5	11	3	3	5	3	4	4	10	6	6	2	2	3	2	4	3	4	4	3	6	4	12
155	3	2	4	3	4	5	6	6	3	3	5	3	4	5	10	6	6	2	2	3	2	5	4	5	5	4	5	3	12
165	7	1	4	5	6	5	4	6	2	3	6	3	7	5	10	5	5	2	2	4	2	7	5	3	5	4	5	3	10
175	7	1	5	3	6	5	4	5	2	3	6	3	7	5	7	5	2	2	2	4	2	5	4	2	3	4	3	2	9
185	6	1	6	5	8	3	4	4	2	3	5	3	6	8	5	5	4	2	2	3	3	5	5	3	3	5	6	2	7
195	3	1	6	6	6	6	4	3	2	3	3	4	6	6	4	5	3	2	3	3	3	4	4	3	3	5	6	2	2
205	1	1	5	5	6	6	4	3	2	3	3	3	6	6	3	5	3	3	5	3	3	3	4	3	3	5	6	2	2
215	0	1	6	6	6	6	4	3	2	3	3	3	5	6	2	4	4	3	5	3	3	3	2	3	5	4	6	2	2
	CREB-DN
Distance um	3	1	1	2	1	1	1	2	1	2	1	1	1	0	0	0	0	0	0	1	1	0
5	6	6	6	5	5	4	4	3	4	5	6	2	4	5	5	6	6	3	4	7	6	4
15	10	6	6	6	6	4	6	6	6	5	6	3	5	6	6	6	6	6	5	9	5	6
25	11	6	7	8	6	4	6	6	6	6	6	3	6	6	7	9	8	5	7	8	5	7
35	9	4	7	9	6	5	5	6	4	7	7	3	5	7	7	11	10	6	7	12	8	7
45	9	2	8	9	6	7	9	5	4	6	7	3	5	8	10	14	9	6	7	13	8	8
55	6	2	9	9	6	7	8	5	4	4	6	4	6	11	10	10	8	5	5	12	7	6
65	5	2	9	9	5	8	7	5	4	3	5	4	7	9	12	7	7	6	6	9	7	8
75	3	2	8	9	4	8	8	5	4	4	5	4	5	8	9	5	7	6	6	9	5	8
85	2	3	7	7	3	6	9	7	2	5	5	3	4	9	6	2	6	7	5	7	6	6
95	1	2	5	5	3	5	8	5	2	5	4	3	5	9	5	2	3	6	4	7	5	6
105	1	2	6	6	2	7	6	6	3	6	4	4	5	8	3	2	5	3	3	5	6	5
115	1	2	6	4	2	6	6	5	3	6	6	3	3	3	5	2	4	2	2	4	4	5
125	2	3	5	3	2	3	6	4	3	2	5	3	4	2	3	1	3	2	1	5	5	3
135	0	3	4	3	2	3	7	3	3	2	5	4	4	2	2	1	1	2	1	4	3	4
145	0	3	4	3	2	4	3	3	4	3	5	4	4	2	2	1	1	1	1	2	2	5
155	0	3	4	2	3	4	3	2	4	3	6	5	4	2	2	2	2	1	1	1	2	4
165	0	3	4	2	3	5	2	2	2	3	7	5	3	2	2	2	2	1	1	1	3	2
175	0	4	5	2	3	6	2	2	2	4	5	5	3	2	2	2	2	1	2	2	2	3
185	0	4	5	2	3	4	2	2	3	3	3	5	2	1	2	2	2	1	2	2	2	1
195	0	2	4	2	3	4	2	1	2	2	3	5	2	1	2	2	2	1	2	2	2	1
205	0	2	4	2	3	4	2	1	1	2	3	5	2	1	2	2	1	1	2	3	1	1
215	0	2	4	2	3	4	2	1	1	2	4	6	2	1	2	2	1	1	2	3	1	1
