# Supplementary material for: BDNF/TrkB signaling endosomes in axons coordinate CREB/mTOR activation and protein synthesis in the cell body to induce dendritic growth in cortical neurons
Source: eLife. 2023 Feb 24;12:e77455. doi: 10.7554/eLife.77455 (PMC9977295; doi:10.7554/eLife.77455)
Supplement: Figure 3—source data 1. [file elife-77455-fig3-data1.xlsx]

## Sheet: Figure 3B
pCREB curve
	Control T0					BDNF 30 min					BDNF 90 min					BDNF 120 min					BDNF 180 min
	n	intensity	area	Normalization		n	intensity	area	Normalization		n	intensity	area	Normalization		n	intensity	area	Normalization		n	intensity	area	Normalization
	1	5.727	49.056	0.32102		1	4.515	58.827	0.253083		1	18.178	20.989	1.01895		1	37.51	31.943	2.10258		1	31.007	46.629	2.18976
	2	5.21	51.83	0.29204		2	42.489	39.51	2.38167		2	25.624	34.696	1.43632		2	28.83	33.411	1.61603		2	45.175	40.326	3.19032
	3	8.247	29.903	0.462276		3	62.29	50.77	3.49159		3	34.513	33.554	1.93459		3	16.378	28.149	0.918049		3	16.941	28.19	1.1964
	4	18.168	48.444	1.01839		4	19.002	34.023	1.06513		4	27.255	40.918	1.52775		4	26.92	44.345	1.50897		4	48.987	22.539	3.45953
	5	9.067	53.544	0.50824		5	49.784	35.492	2.79058		5	31.342	35.757	1.75684		5	35.687	43.304	2.00039		5	41.345	28.414	2.91984
	6	42.039	35.859	2.35645		6	20.966	47.384	1.17522		6	40.615	34.085	2.27663		6	14.82	49.566	0.830717		6	33.435	30.964	2.36123
	7	32.348	32.901	1.81323		7	48.17	44.283	2.70011		7	31.523	31.025	1.76698		7	20.322	36.695	1.13913		7	9.588	33.432	0.677119
	8	8.863	33.575	0.496805		8	34.857	43.304	1.95387		8	39.068	30.372	2.18991		8	30.81	23.498	1.72702		8	42.115	27.761	2.97422
	9	12.772	28.496	0.715919		9	44.599	35.41	2.49994		9	16.483	21.152	0.923935		9	31.268	48.24	1.75269		9	41.75	55.482	2.94845
	10	3.922	36.308	0.219843		10	60.038	42.774	3.36536		10	4.122	39.673	0.231054		10	16.13	42.652	0.904148		10	21.368	33.513	1.50904
	11	16.987	36.879	0.952186		11	58.81	44.283	3.29652		11	17.392	36.451	0.974888		11	35.602	50.831	1.99563		11	3.573	45.222	0.252331
	12	2.794	23.172	0.156614		12	33.974	35.166	1.90437		12	42.721	43.263	2.39467		12	32.206	33.105	1.80527		12	57.842	44.997	4.08489
	13	6.853	22.499	0.384137		13	38.664	30.821	2.16726		13	12.105	42.733	0.678531		13	34.917	39.939	1.95723		13	32.019	43.406	2.26123
	14	28.198	48.71	1.58061		14	46.984	36.818	2.63363		14	46.434	37.593	2.6028		14	34.718	42.427	1.94608		14	19.95	43.59	1.4089
	15	15.286	54.135	0.856839		15	38.546	42.998	2.16065		15	26.931	25.314	1.50959		15	41.987	37.267	2.35353		15	23.955	41.591	1.69174
	16	11.873	33.024	0.665527		16	25.032	23.172	1.40314		16	18.395	34.39	1.03111		16	21.051	37.246	1.17999		16	18.844	29.76	1.33079
	17	9.241	25.864	0.517993		17	59.984	47.323	3.36233		17	19.443	23.111	1.08985		17	29.931	34.86	1.67775		17	27.598	48.057	1.94901
	18	7.518	14.523	0.421413		18	24.434	30.474	1.36962		18	30.73	30.393	1.72253		18	40.518	32.391	2.27119		18	41.072	41.611	2.90056
	19	18.414	43.733	1.03217		19	31.117	31.453	1.74423		19	18.724	25.987	1.04955		19	48.516	60.826	2.71951		19	22.293	34.88	1.57436
	20	23.652	47.078	1.32578		20	44.512	46.486	2.49507		20	18.017	28.557	1.00992		20	30.831	38.062	1.7282		20	31.483	42.59	2.22338
	21	26.958	36.614	1.5111		21	56.29	30.902	3.15527		21	32.356	43.019	1.81368		21	41.721	26.578	2.33862		21	33.605	35.941	2.37323
	22	33.335	38.837	1.86855		22	50.069	33.289	2.80656		22	35.922	37.817	2.01357		22	45.665	29.25	2.5597		22	29.26	31.678	2.06638
	23	26.048	47.567	1.46009		23	52.75	43.386	2.95684		23	32.202	24.498	1.80504		23	28.699	38.307	1.60869		23	21.615	27.72	1.52648
	24	10.053	40.265	0.563509		24	47.653	44.875	2.67113		24	59.996	47.465	3.363		24	19.238	38.49	1.07836		24	37.253	48.71	2.63086
	25	28.785	47.057	1.61351		25	30.167	37.409	1.69098		25	26.491	25.048	1.48492		25	35.267	30.515	1.97685		25	17.78	28.149	1.25565
	26	28.429	36.287	1.59355		26	54.091	55.951	3.03201		26	45.126	25.048	2.52948		26	29.975	59.5	1.68021		26	24.466	34.86	1.72782
	27	8.284	39.796	0.46435		27	35.134	28.679	1.96939		27	27.074	33.799	1.5176		27	21.513	43.488	1.20589		27	32.455	44.385	2.29202
	28	36.822	62.274	2.06401		28	22.494	29.189	1.26087		28	29.359	36.185	1.64568		28	39.368	28.903	2.20673		28	22.559	30.127	1.59315
	29	8.239	29.413	0.461827		29	16.172	27.19	0.906502		29	18.252	30.311	1.02309		29	14.415	48.526	0.808016		29	28.809	41.061	2.03453
	30	35.149	36.655	1.97024		30	22.141	25.028	1.24109		30	38.907	32.881	2.18089		30	37.114	48.689	2.08038		30	17.925	32.432	1.26589
	31	3.129	30.76	0.175392		31	61.962	27.353	3.47321		31	10.663	37.409	0.597702		31	34.711	31.698	1.94568		31	42.364	65.273	2.99181
	32	21.827	40.673	1.22349		32	44.286	42.06	2.4824							32	19.394	33.901	1.08711		32	27.542	26.231	1.94506
	33	13.595	43.814	0.762052		33	32.041	47.486	1.79602												33	40.465	44.875	2.8577
	34	12.051	45.487	0.675504		34	40.194	36.43	2.25303												34	34.479	43.08	2.43496
	35	44.512	31.514	2.49507		35	34.239	48.71	1.91923												35	36.608	29.373	2.58531
						36	27.675	29.128	1.55129												36	35.622	44.141	2.51568
						37	25.009	46.201	1.40185												37	29.163	30.25	2.05953
						38	31.585	42.611	1.77046												38	35.927	35.594	2.53722
						39	44.173	51.423	2.47607
						40	56.282	37.389	3.15482
						41	48.825	22.335	2.73683
						42	47.945	45.364	2.6875
						43	36.203	51.341	2.02932
						44	6.104	45.874	0.342152
			Average	0.999992				Average	2.18132				Average	1.58391				Average	1.7097				Average	2.15254
			Standard Dev	0.666368				Standard Dev	0.822779				Standard Dev	0.676412				Standard Dev	0.520453				Standard Dev	0.78093
			Standard Error	0.112637				Standard Error	0.124039				Standard Error	0.121487				Standard Error	0.092004				Standard Error	0.126684

## Sheet: Figure 3F
Sholl
Distance um	Control
5	1	1	2	1	1	1	2	1	1	2	1	1	2	5	1	1	1	1	2	1	1	5	3	1	1	2	1	1	1	1	1
10	7	6	7	6	4	10	3	6	4	6	10	6	9	5	4	6	5	6	5	8	11	6	3	6	7	3	4	8	15	13	4
15	8	8	9	9	4	11	3	8	5	6	11	9	9	9	6	15	6	6	7	8	11	8	3	8	9	6	10	11	16	10	6
20	8	7	8	10	5	7	4	10	5	5	12	6	10	7	7	12	6	7	6	10	12	8	4	10	10	10	16	12	16	9	8
25	9	8	3	9	6	5	3	8	4	4	13	7	10	7	10	11	7	6	3	8	13	8	4	9	7	10	18	12	13	9	8
30	7	7	3	7	8	2	3	6	7	4	6	12	6	6	6	11	3	6	3	9	16	6	4	8	5	10	12	8	8	10	7
35	4	9	2	6	7	3	3	4	6	4	6	6	6	6	6	10	3	6	3	7	11	5	4	8	5	13	9	7	8	8	7
40	1	7	1	3	7	3	2	2	6	4	5	6	3	6	5	9	3	6	2	7	9	5	5	7	5	11	3	5	7	7	5
45	1	5	1	3	6	2	2	1	5	3	4	6	5	7	3	9	2	5	2	5	7	5	5	7	3	8	3	5	5	6	6
50	1	5	2	2	7	2	3	1	5	3	3	5	4	7	3	7	2	4	1	3	6	5	5	6	2	8	3	5	4	6	5
55	1	5	1	2	6	2	2	1	4	3	3	4	4	8	3	5	2	3	1	4	5	4	4	6	2	6	1	4	2	5	4
60	1	5	1	3	7	1	2	1	4	3	4	4	3	7	2	4	2	3	1	3	5	4	4	5	2	4	1	3	2	5	4
65	0	5	1	2	7	1	2	1	4	3	5	4	3	7	3	3	3	3	6	3	3	3	4	5	2	4	1	4	3	4	5
70	0	4	1	1	7	1	4	2	3	4	5	4	3	11	3	3	3	4	2	3	3	3	4	2	2	4	1	3	2	3	4
75	0	4	1	1	6	1	6	1	4	4	5	5	2	8	1	2	3	4	2	2	4	2	5	2	1	3	1	3	2	3	5
80	0	4	2	0	5	1	6	1	3	3	5	4	1	8	1	1	3	4	2	2	3	2	4	3	2	3	1	3	2	4	3
85	0	3	1	0	5	1	4	1	3	2	4	4	1	7	1	1	2	2	2	2	3	2	5	3	1	3	1	3	2	5	3
90	0	3	1	0	3	1	4	0	3	1	3	4	1	5	1	1	3	2	2	1	3	2	5	2	1	3	1	2	2	3	3
95	0	2	1	0	3	1	3	0	1	2	3	4	1	4	1	1	2	2	2	1	3	1	4	2	1	3	1	1	2	2	2
100	0	1	1	0	2	1	1	0	1	0	2	3	1	4	1	1	1	2	2	1	3	1	4	2	1	3	2	1	2	2	1
Distance um	BDNF
5	1	1	2	1	1	1	2	1	2	1	2	1	2	1	1	3	1	1	1	1	1	1	1	1	1	1	1	1	1	1	1	1	1	1	1
10	3	6	9	9	6	4	7	5	4	6	4	3	5	6	5	5	8	9	8	3	7	7	5	8	8	4	4	10	9	10	10	10	5	8	6
15	5	9	8	13	9	6	7	7	7	8	4	6	5	7	13	9	7	14	14	11	7	9	6	7	21	12	12	12	14	9	19	14	13	12	6
20	5	7	12	14	9	4	6	7	8	10	7	7	6	8	11	11	8	11	19	12	13	7	9	7	20	12	11	13	13	10	18	14	14	14	9
25	8	7	11	17	6	5	5	10	9	6	8	10	6	7	12	13	8	12	17	13	13	3	9	7	20	18	15	12	14	12	17	19	12	18	8
30	10	9	11	15	7	10	4	10	10	5	7	11	6	9	8	12	12	11	12	12	10	4	9	6	24	17	19	12	13	10	10	16	16	20	6
35	8	9	10	8	6	10	4	10	8	6	6	10	5	10	9	8	11	10	8	13	11	4	9	8	18	15	14	12	11	8	8	14	14	13	4
40	7	7	9	6	5	12	4	10	7	4	6	8	3	10	7	8	11	10	5	10	8	3	8	7	24	20	9	10	11	7	9	15	14	11	4
45	5	5	10	5	6	9	2	7	6	4	6	8	3	9	6	4	11	10	2	9	6	5	7	8	22	18	6	10	12	7	8	12	11	10	3
50	5	7	10	4	3	10	2	7	5	3	5	7	4	7	5	2	9	7	2	11	4	6	6	6	21	12	4	9	10	10	6	15	14	10	3
55	5	5	8	3	2	8	2	4	5	3	4	5	7	5	4	2	6	5	2	10	4	5	7	5	18	12	3	8	11	9	5	10	12	9	3
60	7	2	8	2	2	5	2	5	6	3	3	3	6	4	3	2	7	5	2	9	3	6	8	5	12	15	2	7	10	9	6	12	8	6	4
65	6	2	5	1	1	3	2	3	7	1	9	3	3	4	2	2	7	5	2	8	3	6	8	5	12	13	3	7	10	5	5	7	7	6	3
70	7	1	6	0	1	2	2	4	6	1	4	3	2	3	3	2	6	6	4	7	3	4	7	5	9	13	1	6	8	4	5	7	7	3	3
75	6	0	6	0	1	2	2	3	5	1	4	3	3	1	0	1	5	4	2	9	4	5	5	3	5	8	1	5	7	4	5	6	5	2	3
80	4	0	4	0	0	2	2	3	3	2	3	3	3	1	0	3	5	4	2	5	4	4	6	5	6	4	1	6	5	3	4	4	6	2	2
85	4	0	3	0	0	2	2	4	3	1	1	2	2	1	0	3	4	4	2	3	4	8	5	4	6	4	0	6	5	5	3	3	5	2	2
90	3	0	4	0	0	1	3	3	2	1	1	1	2	1	0	3	3	5	2	1	3	5	8	3	3	3	0	7	5	4	3	3	4	3	1
95	2	0	2	0	0	1	3	3	4	1	1	1	1	0	0	3	3	3	2	1	3	3	8	5	3	3	0	7	4	6	5	3	4	2	1
100	2	0	1	0	0	2	2	3	1	1	1	1	1	0	0	3	2	2	2	1	3	3	9	7	1	3	0	5	4	5	4	3	5	2	1
Distance um	KG501
5	3	1	2	2	3	2	1	2	1	1	1	2	3	2	1	2	2	1	3	1	1	3	1	1	2	2	1	1	4	4	1
10	5	3	2	2	3	7	7	6	7	7	7	4	3	7	4	4	5	4	6	5	5	4	9	4	9	3	7	5	8	7	6
15	5	4	2	3	5	10	7	8	7	5	7	4	3	8	9	4	6	5	6	11	5	6	12	7	12	4	7	7	7	8	11
20	4	4	2	7	6	10	6	8	10	5	3	4	3	8	9	3	7	6	6	12	7	8	10	11	9	4	10	10	6	12	11
25	5	3	3	7	5	10	5	8	5	5	2	4	3	7	8	2	6	7	6	12	7	7	10	9	7	5	7	6	7	11	4
30	4	4	3	7	5	9	4	8	4	7	2	3	3	8	8	2	8	6	7	13	5	9	7	8	6	5	5	4	6	9	2
35	4	4	3	6	5	8	3	7	3	4	2	3	2	8	9	2	6	7	7	9	5	10	6	7	7	4	4	3	6	7	3
40	4	3	3	6	5	7	2	7	2	4	4	2	2	7	6	2	6	6	4	8	5	8	6	6	4	2	4	4	5	7	2
45	2	4	2	4	5	6	1	7	1	3	2	2	2	8	6	2	6	6	2	6	5	7	6	5	3	1	5	3	3	6	3
50	2	4	3	2	5	6	1	6	0	2	2	2	2	7	5	2	5	6	1	5	2	5	6	3	2	2	6	2	0	6	2
55	2	2	4	1	5	6	1	5	0	2	2	2	3	6	4	2	5	5	1	5	0	4	6	2	2	3	2	1	0	5	2
60	3	1	2	1	4	7	1	4	0	2	2	1	3	4	4	2	5	7	1	5	0	4	5	2	2	1	2	1	0	4	1
65	2	1	2	1	3	5	2	4	0	0	2	0	3	4	5	2	4	4	1	3	0	4	5	2	2	1	3	2	0	1	1
70	2	1	2	1	3	6	2	5	0	0	2	0	2	2	5	3	4	4	1	2	0	4	3	2	2	1	2	3	0	1	1
75	2	1	2	1	3	8	2	4	0	0	2	0	2	1	4	2	4	3	1	1	0	4	1	2	2	1	3	4	0	1	1
80	2	1	2	1	1	4	2	4	0	0	3	0	2	1	4	2	3	2	1	1	0	4	1	2	2	1	4	3	0	1	1
85	2	0	2	1	3	4	2	2	0	0	3	0	2	1	4	2	3	3	1	1	0	3	2	2	1	1	3	3	0	1	1
90	2	0	1	1	3	2	2	2	0	0	4	0	2	1	4	2	2	1	3	1	0	3	2	2	1	1	3	3	0	1	1
95	2	0	2	2	2	2	0	2	0	0	4	0	2	1	3	2	3	1	2	1	0	3	2	2	1	1	3	3	0	1	1
100	0	0	3	2	3	1	0	2	0	0	3	0	2	1	2	2	2	1	1	1	0	3	2	2	1	1	3	3	0	2	1
Distance um	KG501/BDNF
5	1	1	1	1	1	1	1	1	1	2	1	1	2	1	2	2	1	3	1	1	3	1	1	1	4	2	1	1	1	1	2	1	1	1
10	4	6	7	6	7	5	2	8	6	3	5	4	7	4	4	5	4	6	5	5	4	9	3	7	5	4	8	7	2	6	6	5	4	6
15	7	8	9	6	11	7	2	7	7	4	8	5	8	9	4	6	5	6	11	5	6	9	7	8	6	5	10	15	7	12	7	9	11	9
20	6	9	6	8	12	8	2	6	6	4	7	6	8	9	3	7	6	6	12	7	8	10	9	10	5	4	9	14	9	15	6	10	11	10
25	6	8	7	6	9	7	2	6	8	5	6	7	8	8	2	8	5	6	11	8	7	8	8	11	6	4	8	8	7	13	6	11	10	10
30	3	5	4	4	6	4	2	5	6	5	4	5	8	8	2	8	6	7	13	5	9	8	6	12	4	4	7	6	7	13	7	10	11	5
35	4	5	3	3	5	3	2	5	5	5	3	4	8	9	2	6	7	7	9	5	10	7	6	12	4	5	6	6	7	13	7	10	13	6
40	6	5	2	3	5	4	3	3	5	5	3	5	7	6	2	6	6	4	8	5	8	7	5	8	3	4	7	4	6	9	8	10	8	6
45	5	5	1	3	3	5	3	2	5	6	3	3	8	6	2	6	6	2	6	5	7	6	7	6	3	4	4	4	6	7	6	11	8	3
50	4	3	1	3	3	5	3	2	3	5	1	4	7	5	2	5	6	1	5	2	5	5	8	4	2	4	3	3	5	6	6	11	10	4
55	3	3	1	3	3	4	2	2	2	4	1	3	7	4	2	5	6	1	4	2	4	5	10	4	2	3	3	3	5	6	4	12	8	4
60	3	2	1	3	2	5	3	2	2	3	1	3	6	4	2	5	5	1	5	0	4	6	6	3	3	3	2	3	5	5	4	10	8	4
65	3	3	0	3	0	6	4	2	2	4	1	3	4	5	2	4	4	1	3	0	4	5	5	3	3	3	2	4	5	3	3	7	8	3
70	3	2	0	3	0	4	4	1	2	4	1	3	2	5	3	4	4	1	2	0	4	3	6	3	3	4	2	4	6	2	3	8	9	3
75	3	1	0	1	0	4	5	1	2	3	1	3	1	4	2	4	3	1	1	0	4	2	6	3	3	5	2	4	6	2	3	9	7	3
80	2	0	0	1	1	4	4	1	2	3	3	3	1	4	2	3	2	1	1	0	4	2	6	3	3	6	3	3	6	2	3	8	8	3
85	2	0	0	0	0	2	2	1	1	3	1	3	1	4	2	3	3	1	1	0	3	2	6	4	3	6	1	3	4	2	2	6	5	3
90	2	0	0	0	0	1	2	1	1	3	1	2	1	4	2	2	1	3	1	0	3	2	6	2	3	6	1	3	3	2	2	5	5	4
95	0	0	0	0	0	1	2	1	1	2	1	2	1	3	2	3	1	2	1	0	3	2	4	2	2	6	1	3	3	2	1	5	5	4
100	0	0		0	0	1	2	1	1	2	1	1	1	2	2	2	1	1	1	0	3	2	4	1	1	5	1	3	4	1	1	5	4	3

## Sheet: Figure 3D
Number of primary dendrites
	Control	BDNF	KG501	KG501+BDNF
	7	8	5	6
	6	11	4	6
	7	8	2	7
	9	9	4	6
	4	7	4	8
	8	7	7	5
	3	8	6	2
	6	7	6	6
	4	8	7	4
	4	8	6	5
	9	7	6	4
	9	9	4	5
	6	10	3	8
	6	7	10	4
	6	12	4	6
	4	12	4	4
	5	7	8	5
	6	8	5	6
	6	6	2	5
	11	13	5	4
	6	11	4	8
	3	14	6	9
	6	9	4	7
	4	11	6	5
	7	11	5	4
	9	12	9	8
	9	9	9	12
	12	11	12	7
	10	11	4	11
	6		7	6
			10	8
			6	14
			6	9
			8
Average	6.6	9.34483	5.82353	6.48485
Standard Dev	2.32824	2.14269	2.31557	2.52638
Standard Error	0.425076	0.397888	0.397117	0.439786

## Sheet: Figure 3E
Branching points
	Control	BDNF	KG501	KG501+BDNF
	6	13	3	7
	10	12	4	5
	3	11	6	3
	4	18	4	6
	7	14	9	8
	5	8	9	7
	4	13	2	5
	6	13	7	2
	5	14	3	4
	4	11	4	4
	6	10	5	4
	4	12	2	6
	8	11	4	6
	7	6	4	4
	3	4	5	4
	5	14	1	2
	4	8	8	3
	4	12	4	10
	6	20	7	4
	7	18	6	6
	4	25	2	6
	3	30	8	11
	9	11	5	12
	11	17	2	4
	8	54	1	7
	14	38	7	9
	8	20	3	11
	20	25	7	4
	9	21	11	16
	11	22	15	3
		30	16	16
		32	7	18
		41	13	10
		30	8
		13
Average	6.83333	18.6	5.94118	6.87879
Standard Dev	3.69607	10.885	3.72495	4.12884
Standard Error	0.674807	1.83989	0.638823	0.718739

## Sheet: Figure 3H
	GFP		CREB-DN
	No ligand	BDNF	No ligand	BDNF
	70	58.681	30.556	57.042
	90.909	48.765	78	47.765
	60.976	92.857	59.016	91.111
	93.359	93.827	55.349	96.244
	91.166	91.081	88.599	96.085
	92.893	71.975	87.151	76.712
	88	85.876	70.844	87.864
	90.988	85.034	86.667	83.945
	86.161		91.603
			89.024
Average	84.9391	78.512	73.6809	79.596
Std. Dev	11.4751	16.9704	20.3263	18.1231
Std. Error	3.82505	5.99994	6.29534	6.40748

## Sheet: Figure 3J
	GFP		CREB-DN
	No ligand	BDNF	No ligand	BDNF
	1.62	4.62	0.93	1.65
	3.63	3.57	0.88	1.54
	1.83	4.17	1.47	1.05
	2.06	4.1	0.78	1.02
	1.46	3.53	1.04	1.38
	6.46	11	0.81	2.86
	5.55	13.66	1.22	1
	7.11	15.95	1.12	1.14
			1.15
			0.72
Average	3.715	7.575	1.012	1.455
Std. Dev	2.33611	5.12281	0.23299	0.619262
Std. Error	0.825939	1.81119	0.073678	0.218942
