# Supplementary material for: BDNF/TrkB signaling endosomes in axons coordinate CREB/mTOR activation and protein synthesis in the cell body to induce dendritic growth in cortical neurons
Source: eLife. 2023 Feb 24;12:e77455. doi: 10.7554/eLife.77455 (PMC9977295; doi:10.7554/eLife.77455)
Supplement: Figure 5—figure supplement 1—source data 2. — Graph C, D, F-H´s raw data. [file elife-77455-fig5-figsupp1-data2.xlsx]

## Sheet: Graph C
pTrkB levels
	vehicle	BDNF	pre 1NM-PP1/BDNF	post 1NM-PP1/ BDNF
	1.03338	2.3698	1.13966	1.16368
	1.0853	1.70676	1.02958	1.02549
	0.88132	1.46042	0.669475	1.09188
Average	1	1.84566	0.946239	1.09368
Standard Dev	0.106008	0.470335	0.245922	0.0691102
Standard Error	0.0612037	0.271548	0.141983	0.0399008

## Sheet: Graph D
pAKT levels
	vehicle	BDNF	pre NM	post NM
	0.442557	2.59172	0.289516	0.524956
	0.94032	3.70355	0.877837	1.46082
	1.61712	3.72273	1.37309	1.20204
Average	1	3.33933	0.846814	1.0626
Standard Dev	0.589553	0.647522	0.542452	0.48326
Standard Error	0.340379	0.373847	0.313185	0.27901

## Sheet: Graph F
pCREB levels
	vehicle	BDNF	pre 1NM-PP1/BDNF	post 1NM-PP1/BDNF
	1.24966	1.82896	0.666111	1.44182
	1.79076	1.58657	1.34409	1.40162
	0.888311	1.57979	0.454573	1.1653
	0.830672	1.68002	0.664196	1.52523
	1.70441	1.7179	1.58251	1.99482
	0.732007	1.89012	0.335941	0.851667
	0.851008	1.67785	1.95268	0.93446
	1.08669	1.95641	0.835337	0.190725
	1.16108	1.35498	0.888788	0.222183
	0.756355	1.87634	0.9541	0.367949
	0.850351	1.55741	0.384479	0.746625
	0.766207	0.961176	0.94303	0.403219
	0.984966	1.11638	0.883253	0.233939
	0.347518	2.62509	0.227762	0.259744
	0.781173	2.83972	1.79015	0.293159
	1.40353	2.36276	1.61161	2.33004
	0.648731	1.77114	1.01985	2.54773
	1.15573	2.17495	1.70752	1.68759
	0.61141	1.4786	1.3672	1.86443
	0.407725	3.99272	0.845418	2.93925
	0.999881	2.78268	0.780976	0.0336538
	0.908239	2.82062	0.445481	0.593145
	1.67518	4.5986	0.332095	1.22165
	2.00158	3.12365	0.245592	1.78784
	0.952083	3.26999	0.336602	1.91824
	0.589231	3.21354	0.270183	2.1921
	0.738515	3.50001	1.16684	2.92677
	1.19321	5.01909	0.428086	2.40161
	0.935597	4.3533	0.422393	0.400124
	0.228869	2.1876	0.616905	2.11505
	0.230529	2.02114	1.0678	2.4807
	0.797699	5.39084	0.589824	2.0739
	1.18404	3.92212	0.649601	1.08642
	0.466632	3.29517	3.22452	0.658812
	0.271566	3.44319	2.49486	1.08832
	1.39318	6.2773	1.53582	0.501819
	3.18293	3.97652	0.535265	0.746462
	0.662331	7.39923	0.780462	1.48047
	2.56484	6.14011	0.753104	0.343599
	2.43342	4.56045	1.26239	0.714517
	0.396972	3.42042	0.845141	1.07642
	0.38353	7.4594	1.60991	0.903653
	0.643038	5.32023	1.12584	0.528861
	1.63932	4.72721	1.05665	0.537005
	1.1143	4.966	1.27679	0.997905
	0.532023	7.55784	1.3402	1.62801
	0.670871	4.00474	0.347316	1.53242
	0.793587	6.63122	0.461018	0.421483
	0.408516	9.07267	2.18696	0.418479
		5.9573	0.439353	0.251483
		7.66965	0.373883	0.552186
		5.45117	0.364948	1.28904
		5.36586	1.37028	0.699415
		2.49822	3.31454	0.413655
		4.62513	1.75536	1.04266
		2.50478	1.02135	0.681466
		3.03032	1.54827	1.15233
		3.52372	1.2588	0.215189
		2.15668		0.643789
		2.32004		0.282518
		2.17225		0.579584
		3.26769		0.714478
		3.04914		1.78714
				0.498695
				2.5455
				1.41749
				0.847157
				0.422076
				0.793232
				1.0378
				0.614612
				0.9694
Average	1	3.5885	1.0361	1.07864
Standard Dev	0.614916	1.89746	0.68259	0.737758
Standard Error	0.0878451	0.239057	0.0896284	0.0869456

## Sheet: Graph G
p4E-BP1 levels
	vehicle	BDNF	pre NM	post NM
	0.78506	2.25502	1.96592	1.06454
	1.05554	1.54066	1.84891	1.38557
	0.688361	2.37541	1.39303	0.629664
	1.11355	2.23879	0.813216	1.3868
	0.696823	2.07808	1.97169	0.596354
	0.754289	1.65497	0.896454	0.915455
	0.691284	1.6619	0.694284	1.01323
	0.642357	2.09855	0.640126	0.996231
	0.622048	2.50642	1.71636	0.836449
	1.4036	3.63259	2.25417	1.06193
	0.933713	3.019	1.38565	1.66544
	1.37275	1.85322	0.636664	1.36641
	0.694772	1.06831	2.19225	1.40157
	0.962331	1.71344	3.50312	1.02362
	0.614997	1.99062	2.60166	1.33295
	0.955715	1.62305	2.57135	0.765674
	0.662462	0.673283	1.62428	0.684283
	1.43711	1.80406	0.902377	2.23194
	1.78837	1.6459	1.19971	1.85876
	1.68367	2.32464	1.4568	1.05885
	1.98792	1.87814	0.891761	1.04516
	2.84568	1.77868	0.882375	1.69344
	2.59012	1.5482	0.910993	2.61805
	0.877067	1.04193	1.05116	1.70382
	0.925302	1.055	0.1954	1.51866
	0.762674	1.50281	0.579352	2.20332
	1.16401	1.39549	0.603816	1.15755
	0.335026	2.11178	0.941072	0.0280021
	0.535272	1.72367	1.35003	0.0207708
	0.250481	3.57243	1.03062	0.0359258
	0.350642	2.31533	1.42988	1.36987
	0.539657	2.97708	0.675052	2.36103
	0.695669	1.54797	0.332564	0.467113
	0.650666	1.51196	0.155397	1.32541
	1.00303	0.930918	0.36549	0.77129
	0.855789	1.48627	0.490192	0.741519
	1.86387	0.834295	0.627433	0.792599
	0.857404	0.857404	1.48346	1.20155
	0.610539	0.610539	1.50138	1.76329
	0.741395	0.741395	0.997001	1.48473
	1.16569	2.07664	1.63835	2.01504
	1.593	1.41573	1.79375	1.62455
	1.60216	2.21044	1.51507	1.73217
	1.28389	2.10062	0.630831	0.932871
	0.783237	1.25489	0.983711	1.68009
	0.993664	1.12686	0.324153	0.864614
	1.35603	1.78881	1.72142	1.49601
	1.16551	1.60898	0.476502	0.840014
	1.34053	1.4378	0.803199	0.736582
	0.810777	2.61831	0.841598	1.31046
	0.665666	1.38187	1.03382	1.4709
	0.699541	2.14859	0.631962	1.3587
	1.02205	1.38973	0.833228	1.01487
	0.976246	1.83615	1.08991	1.85432
	0.861391	1.85379	0.821635	1.18402
	0.754169	2.00837	0.906405	1.18402
	0.281682	2.07289	0.775828	0.950855
	0.288299	1.4942	0.628286	1.9064
	0.373409	1.91268	0.566136	1.71113
	0.591754	2.29972	0.621386	1.13323
	0.619294	1.57507	0.691397	1.57586
	0.771248	1.5814	1.55352	1.18322
	0.564439	0.97455	1.27602	1.11977
	0.449527	0.988631	1.13086	2.31979
	0.712152	1.48453	1.14358	2.34952
	0.889949	1.04156	1.1096	1.98047
	1.37137	1.76028	1.49641	1.92635
	0.431657	1.53995	1.17785	1.83869
	0.428829	1.31228	1.19046	1.88563
	0.81434	1.915	0.960016	1.01468
	0.352089	1.4817	0.812361	0.913625
	0.579312	2.03387	1.15404	1.05116
	0.310637	1.21405	0.911721	1.25734
	2.53052	1.65752	1.30385	1.01825
	1.37054	4.52852	0.467114	1.4607
	1.07416	1.42091	0.839053	1.49279
	1.95494	1.09139	0.9042	0.941976
	2.02145	1.05112	0.997453	1.33891
	2.0016	1.8408	0.770004	0.616467
	2.26937	0.82237	0.725498	2.00656
	1.77867	2.02069	1.1502	1.84522
	1.23045	2.21862	1.40711	0.736073
	0.975568	1.64949	1.16247	1.45495
	0.993042	1.9353	0.547587	1.42968
	0.692019	1.79862	0.429621	1.4023
	0.690832	1.8416	0.536164	1.88367
	0.513317		0.697731	0.592149
			0.677995	0.787817
			0.78137	1.05898
				0.524231
				1.15416
Average	1.00001	1.74414	1.07197	1.28286
Standard Dev	0.555861	0.649045	0.567252	0.529269
Standard Error	0.0595946	0.0699884	0.0601286	0.0554825

## Sheet: Graph H
pS6 levels
	vehicle	BDNF	pre NM	post NM
	1.28998	3.15872	2.87625	1.87642
	0.996524	3.617	0.792569	1.31276
	1.73106	4.76597	0.49382	3.3111
	1.06038	7.74574	0.910046	3.897
	0.933359	7.18662	0.518393	2.1202
	0.92164	7.41524	0.495427	2.74681
	1.07295	5.47549	0.533893	8.62044
	0.561458	3.14835	0.570941	4.52831
	0.479328	2.03643	0.552984	3.97958
	0.541643	12.6656	0.627648	2.91718
	0.577462	2.93268	0.460647	3.27556
	0.429931	2.31089	0.607517	2.0249
	1.71415	1.21267	2.16796	0.530648
	0.837651	3.42281	2.39781	0.668445
	1.29839	2.57316	1.68756	0.435475
	1.71159	2.75972	0.511651	0.918805
	0.590127	3.32178	0.86172	0.560797
	0.573871	2.8669	0.272255	0.805391
	0.8678	3.6607	1.60766	1.16746
	1.01212	3.62535	1.64566	1.26443
	1.40179	3.27433	1.52714	1.23305
	1.2569	1.76632	1.07131	6.78507
	1.38997	7.13344	1.19522	6.4281
	0.858727	6.54048	0.610384	3.19403
	2.18787	9.63326	1.65993	4.16872
	0.868021	3.3559	1.65161	1.86747
	0.835036	5.98916	1.75113	2.57933
	0.53676	5.12684	0.919813	2.60561
	0.495553	6.15002	3.06436	1.31345
	0.613502	5.23572	2.11859	0.728617
	0.42259	7.58262	2.60948	1.52752
	0.304451	1.86754	1.46993	1.43282
	0.528443	3.55758	1.00739	2.84462
	0.66416	2.84478	0.882733	2.09254
	0.527119	15.2778	0.583889	2.03328
	0.295189	10.8883	0.745408	1.73415
	0.872494	16.0556	0.735296	1.59323
	1.00093	9.9511	0.560293	2.02978
	0.751331	4.80242	0.493851	2.93737
	1.26084	7.54021	0.316927	2.82556
	1.10821	2.70418	0.543659	3.68561
	3.09294	5.83599	0.254644	5.92874
	1.44419	4.99749	0.328268	2.32532
	1.06983	6.77288	0.641856	2.85231
	2.01173	7.01284	0.71151	2.775
	1.51181	5.28203	0.581652	1.84927
	1.93145	9.33224	0.450943	2.29044
	0.743567	18.7309	0.801743	0.711447
	3.09526	3.82893	0.44515	6.96463
	1.25108	2.34226	0.595006	3.20362
	2.11663	2.98691	1.11356	4.64689
	1.42614	6.21139	0.903169	1.61072
	0.344485	11.0118	0.612367	1.55178
	0.545739	22.5621	1.43657	1.36172
	1.7142	12.8613	1.44	5.79396
	0.811642	20.2038	0.700316	2.7242
	1.03277	10.936	0.891824	2.7989
	1.23448	9.11987	2.16468	2.40028
	1.60981	5.90346	0.966523	4.82904
	0.771893	5.03722	0.265902	3.70672
	1.34893	13.4984	0.481091	5.98044
	0.922434	7.25993	0.493199	5.05778
	1.05493	11.7277	0.871721	6.56365
	1.51934	6.71556	1.13443	2.08488
	0.647394	5.45229	1.12917	5.77736
	1.14014	12.9215	0.0975432	3.51742
	0.668411	14.368	0.528378	4.39599
	0.932714	10.7045	0.274355	3.2257
	1.3318	8.46334	0.302453	3.34624
	1.13191	5.68895	0.963096	2.9844
	1.96389	4.50085	0.226611	3.02826
	2.60077	6.89579	0.173842	1.63364
	1.20753	3.04547	0.31456	1.76865
	1.28222	15.1995	0.406849	1.60463
	0.892281	7.68665	0.347226	1.00658
	0.43015	6.57461	0.868294	1.94112
	0.321413	7.73348	1.95932	1.50868
	0.838369	10.9506	0.948705	2.2486
	0.464948	13.7896	1.45424	1.73141
	0.30527	4.0362	1.76217	1.45454
	0.223717	5.35909	2.76022	1.6213
	0.13554	7.79379	1.43825	1.2293
	0.290421	8.54649	1.38114	1.36568
	0.352328	6.59357	1.25824	0.97528
	0.513987	20.1345	0.687828	2.79982
	0.609245	17.3654	0.466014	3.45498
	0.962411	16.267	0.636429	1.98658
	0.524723	10.8048	0.734886	7.4758
	0.495026	7.67751	0.592493	5.39587
	0.585945	12.0128	0.81819	4.7439
	0.263161	10.5236	0.963477	6.43755
	1.90015	4.19954	1.81555	5.79701
	0.689275	8.44461	1.19032	4.52826
	0.434794	10.1341	0.476446	5.96734
	0.754151	4.79553	1.0665	5.65781
	0.697042	9.27315	1.08523	10.9702
	1.07693	16.8265	1.6296	5.01362
	1.34535	4.1655	0.657217	4.75913
		2.78802	0.462131	4.14235
		5.83538	0.659502	2.3185
		11.4995	1.20524	3.47554
		14.109	0.75042	1.75471
		12.8957	0.550765	2.91175
		13.7237	0.389944	2.76098
		10.2615	0.561959	3.24071
		19.5491	0.744252	4.80444
		5.76982	1.05059	3.45894
		5.07149		3.93843
		7.42714		5.42214
		14.4578		1.49003
		22.7478		2.85586
		9.55916
Average	1	8.10691	0.955014	3.12199
Standard Dev	0.587829	4.93823	0.62267	1.91974
Standard Error	0.0593797	0.466619	0.0601958	0.182214
