# Supplementary material for: BDNF/TrkB signaling endosomes in axons coordinate CREB/mTOR activation and protein synthesis in the cell body to induce dendritic growth in cortical neurons
Source: eLife. 2023 Feb 24;12:e77455. doi: 10.7554/eLife.77455 (PMC9977295; doi:10.7554/eLife.77455)
Supplement: Figure 5—source data 1. [file elife-77455-fig5-data1.xlsx]

## Sheet: Figure 5E
pTrkB levels
	Fc	Fc	FC+1NM-PP1	FC+1NM-PP1	Fc
	Veh	BDNF	Veh	BDNF	BDNF+1NM-PP1
	0.956	3.252	1.41104	2.57669	0.797546
	0.068	3.865	0.858896	2.63804	0.0613497
	0.751	4.233	1.59509	0.245399	1.71779
	0.068	2.454	1.41104	3.37423	2.45399
	0.273	1.656	1.41104	2.39264	1.53374
	2.662	2.086	2.76074	2.20859	1.16564
	2.935	1.227	2.26994	2.63804	0.552147
	3.276	1.718	0.736196	1.59509	0.858896
	0.341	2.025	1.71779	1.22699	1.1043
	0.41	1.043	1.1043	0.552147
	2.048	2.638	0.674847	2.88344
	0.683	2.822	0.245399	3.31288
	0.068	3.681	0.858896	1.77914
	0.273	5.337	1.1043	2.33129
	1.16	3.252	0.797546	2.26994
	0.614		1.53374	1.53374
	0.546			0.0613497
	2.935			1.77914
	1.57			0.245399
	0.614
Average	1.11255	2.7526	1.28067	1.87601	1.13838
Standard Dev	1.06968	1.1974	0.630391	1.01969	0.700241
Standard Error	0.239188	0.309168	0.157598	0.233934	0.233414

## Sheet: Figure 5G
pCREB levels
	Fc	Fc	FC+1NM-PP1	Fc
	Veh	BDNF	BDNF	BDNF+1NM-PP1
	1.19028	2.2751	0.69068	1.12215
	1.20037	2.06555	1.65139	1.83676
	1.34882	2.64519	1.22376	0.983507
	1.11525	2.36062	0.716804	0.880116
	1.23287	2.03649	1.62515	1.23863
	0.863815	2.10837	0.471499	1.04509
	1.53998	2.25792	1.29029	1.29013
	1.2686	2.65205	0.698291	1.30645
	1.70067	2.04924	1.34561	1.60301
	1.3786	2.55595	1.19238	1.8422
	1.18292	1.55172	0.926953	1.06361
	1.06921	1.74737	0.903578	1.34295
	1.25808	2.52213	0.569399	1.65786
	1.18937	2.44587	1.02674	0.660798
	1.23476	2.23131	0.507053	1.11653
	1.11697	2.24281	0.293071	0.700778
	0.165569	1.8787	0.822109	0.555218
	0.115397	1.79371	0.590492	1.25153
	0.184699	1.25611	1.85412	1.11036
	0.186382	2.01957	1.12269	1.28758
	0.175293	2.39995	1.25187	1.6452
	0.195358	3.33648	1.22391	1.75093
	0.142531	2.67588	1.99962	1.43349
	1.16281	2.18363	1.75443	2.16165
	2.27444	2.76515	1.55165	0.0834949
	0.622083	2.90553	2.06437	1.53227
	1.79251	1.86628	1.24277	1.63102
	1.00098	2.34493	1.08754	1.63156
	1.42291	1.69645	1.28245	0.820681
	1.14628	1.2787	2.49895	1.27301
	1.0798	1.2373	1.22502	0.993992
	0.632685	3.41214	0.640296	0.628092
	1.00144	7.00181	0.904993	1.01461
	0.947083	3.14763	0.660978	1.25541
	1.06457	3.65262	0.839001	2.06896
	1.13417	3.94921	1.41959	1.4575
	1.16075	4.22825	1.23122	2.15348
	1.27855	6.44119	0.993535	1.74627
	1.03711	4.50201	1.12339	3.06649
	1.14127	3.30375	0.548248	2.94277
	1.38886	3.51808	0.48264	2.94748
	1.26459	2.78764	0.934233	2.27959
	0.963205	3.04281	1.11621	1.58967
	1.21941	4.70376	1.28398	0.669407
	1.32325	3.68189	0.805651	0.654402
	1.07287	3.42792	0.574906	1.10791
	1.01764	1.76694	1.18589	0.271769
	0.68976	2.68944	1.19898	0.999122
	1.26467	2.50802	1.02299	1.5757
	0.615532	3.7149	0.52167	2.2222
	1.32804	2.87277	0.576822	1.10129
	0.54745	1.52207	0.579695	1.73374
	1.0874	5.46253	0.682975	1.99242
	0.391492		1.7319	1.10743
	1.06393		0.351824	1.25046
	1.47913		0.967755	4.28869
	1.16921		0.783143	3.60156
	0.791045		0.840211	2.04358
	1.01493		0.903663	1.5496
	0.473142		0.624551	1.8537
	0.482959		0.611861	1.49621
	0.587836		0.789848	1.34863
			0.51289	1.4136
			0.398835	1.04079
			1.00455	1.51624
			0.948599	1.3784
			0.636683	2.31216
			0.506744	2.55719
			0.759199	2.76167
				2.70205
				1.31527
Average	1.00309	2.8061	0.991374	1.54744
Standard Dev	0.43755	1.19328	0.446869	0.744548
Standard Error	0.0555689	0.163909	0.0537967	0.0883616
