# Supplementary material for: BDNF/TrkB signaling endosomes in axons coordinate CREB/mTOR activation and protein synthesis in the cell body to induce dendritic growth in cortical neurons
Source: eLife. 2023 Feb 24;12:e77455. doi: 10.7554/eLife.77455 (PMC9977295; doi:10.7554/eLife.77455)
Supplement: Figure 6—source data 1. [file elife-77455-fig6-data1.xlsx]

## Sheet: Figure 6F
	Sesion:20221123BDNF_Biotin488 pTrkB555 Cell signalingMAP2647
		BDNF	pTrkB itensity	Number of vesicles BDNF+		Size range
	Picture ID	Area	Mean	pTrkB+	pTrkB-
	_031	0.024	0.241	0	9	0.02-0.04
	_004	0.026	0
	_016	0.031	10.25
	_031	0.032	0
	_046	0.034	0
	_031	0.035	3.101
	_019	0.039	0
	_019	0.039	14.733
	_018	0.04	0
	_031	0.041	1.36	2	18	0.04-0.06
	_004	0.042	0
	_019	0.044	3.677
	_040	0.043	40.057
	_003	0.046	0
	_019	0.046	0
	_007	0.047	12.829
	_019	0.047	0
	_040	0.049	36.849
	_043	0.051	7.511
	_019	0.051	0
	_031	0.054	5.119
	_031	0.054	0
	_011	0.055	8.667
	_016	0.055	2.399
	_046	0.055	5.476
	_019	0.057	0
	_007	0.057	1.853
	_004	0.059	7.615
	_021	0.06	15.453
	_019	0.061	9.277	4	15	0.06-0.08
	_031	0.061	2.063
	_043	0.061	45.416
	_004	0.062	0
	_019	0.062	2.625
	_040	0.064	50.238
	_004	0.065	0
	_004	0.065	0
	_046	0.066	0
	_034	0.066	9.387
	_031	0.068	0
	_021	0.07	60.635
	_004	0.07	23.296
	_043	0.072	41.804
	_031	0.072	2.404
	_031	0.071	0
	_019	0.07	0.404
	_016	0.074	4.705
	_011	0.078	6.815
	_042	0.082	36.405	5	9	0.08-1.00
	_011	0.082	2.119
	_016	0.085	4.437
	_020	0.087	1.94
	_049	0.087	4.763
	_046	0.091	2.162
	_018	0.091	1.611
	_021	0.094	44.247
	_017	0.095	61.085
	_016	0.096	6.917
	_045	0.099	25.447
	_045	0.099	2.654
	_004	0.099	26.671
	_011	0.099	12.294
	_040	0.106	24.751	17	14	1.00-2.00
	_028	0.107	46.839
	_040	0.107	7.136
	_031	0.11	20.418
	_021	0.112	48.954
	_018	0.113	0
	_046	0.115	27.829
	_018	0.115	0.693
	_046	0.115	1.343
	_046	0.117	6.042
	_038	0.121	3.266
	_003	0.128	30.87
	_016	0.133	0
	_046	0.142	25.787
	_031	0.142	23.757
	_017	0.144	65.164
	_034	0.146	2.07
	_021	0.147	64.499
	_015	0.15	31.048
	_043	0.152	66.195
	_028	0.155	36.77
	_007	0.164	43.381
	_019	0.169	4.89
	_028	0.17	39.283
	_042	0.174	15.392
	_015	0.176	52.928
	_007	0.187	105.514
	_010	0.189	46.304
	_003	0.193	7.779
	_043	0.194	35.5
	_028	0.195	25.481
	_049	0.202	6.984	24	14	2.0-4.0
	_046	0.204	0
	_041	0.217	13.884
	_017	0.223	64.917
	_003	0.229	43.25
	_027	0.229	3.285
	_030	0.234	1.262
	_030	0.234	28.709
	_043	0.237	59.718
	_003	0.238	17.305
	_019	0.242	42.014
	_003	0.246	46.291
	_021	0.263	62.399
	_041	0.251	9.861
	_011	0.265	72.766
	_050	0.269	1.317
	_045	0.27	36.443
	_053	0.289	49.708
	_053	0.291	32.974
	_028	0.293	69.825
	_054	0.302	25.566
	_010	0.302	83.6
	_015	0.308	64.395
	_023	0.32	36.993
	_021	0.327	6.18
	_010	0.328	36.447
	_003	0.331	83.66
	_038	0.332	24.543
	_033	0.34	14.612
	_021	0.353	61.962
	_010	0.357	50.099
	_053	0.358	43.99
	_043	0.359	53.678
	_035	0.36	23.76
	_056	0.361	4.854
	_018	0.37	41.612
	_051	0.389	19.371
	_032	0.395	29.16
	_010	0.401	79.246	9	2	4.0-6.0
	_034	0.411	2.454
	_041	0.449	30.021
	_004	0.452	48.337
	_017	0.472	97.214
	_033	0.491	26.474
	_004	0.505	26.284
	_041	0.508	12.712
	_044	0.556	26.514
	_042	0.59	51.95
	_042	0.591	25.784
	_021	0.629	48.437	7	0	>6.0
	_027	1.045	36.181
	_029	1.083	33.156
	_040	1.15	26.621
	_047	1.167	51.47
	_029	1.43	39.417
	_027	1.551	46.12
