# Supplementary material for: BDNF/TrkB signaling endosomes in axons coordinate CREB/mTOR activation and protein synthesis in the cell body to induce dendritic growth in cortical neurons
Source: eLife. 2023 Feb 24;12:e77455. doi: 10.7554/eLife.77455 (PMC9977295; doi:10.7554/eLife.77455)
Supplement: Figure 7—figure supplement 1—source data 1. — Graph B´s raw data. [file elife-77455-fig7-figsupp1-data1.xlsx]

## Sheet: Graph B
Sholl
Distance um	Control
5	1	1	1	1	1	1	1	1	1	1	1	1	1	1	1	1	1	1	1	1	1	3	1	1	1	1	1	1	1	1	1	1	1	1	1	1	3	1	1
10	7	12	5	5	9	7	6	8	5	5	9	9	7	6	8	5	8	8	8	6	9	6	15	6	10	7	9	11	9	8	9	5	2	5	11	7	7	8	7
15	8	13	8	8	12	12	11	11	5	5	12	12	9	8	10	6	11	11	7	9	11	10	16	10	13	9	12	12	9	8	12	6	6	5	13	9	10	9	12
20	9	12	10	9	10	14	9	11	5	6	13	11	10	9	8	8	12	12	7	9	12	12	14	11	11	10	12	11	9	8	10	7	8	7	11	10	10	11	11
25	8	12	10	10	8	14	9	9	5	7	14	9	12	9	7	9	12	12	8	10	13	12	11	9	7	10	10	10	8	8	10	7	10	8	10	9	9	11	8
30	9	12	9	10	6	14	11	7	6	7	13	6	11	7	5	9	10	10	8	11	11	11	8	8	5	7	7	9	6	7	9	7	9	8	9	7	7	10	6
35	8	11	8	8	4	12	11	5	8	7	12	3	8	6	3	8	9	9	8	10	8	8	5	8	4	4	4	7	6	6	10	7	8	7	7	4	6	7	4
40	8	9	7	5	3	7	8	3	8	7	10	2	6	5	2	7	6	6	7	8	6	6	4	7	4	3	2	6	6	6	6	7	7	7	5	2	5	4	2
45	5	6	5	3	2	4	5	1	8	5	8	2	5	2	1	7	2	2	6	5	4	4	3	5	3	4	2	5	6	6	3	7	6	6	2	3	4	2	1
50	5	4	4	3	2	3	4	1	7	4	8	3	4	0	1	7	3	3	6	3	3	3	2	3	2	2	2	4	4	4	4	6	5	6	2	2	4	1	1
55	5	3	3	2	2	0	2	1	5	4	8	2	3	0	0	6	0	0	7	3	2	3	1	2	1	1	2	3	1	1	2	6	5	5	2	0	3	1	0
60	4	4	2	2	3	0	1	1	4	4	7	2	1	0	0	5	0	0	6	2	2	3	0	0	0	0	2	2	0	0	2	5	4	3	0	0	3	1	0
65	4	4	1	0	2	0	0	1	4	5	5	0	1	0	0	3	0	0	2	2	0	1	0	0	0	0	2	1	0	0	0	4	4	2	0	0	2	1	0
70	1	3	1	0	1	0	0	1	3	5	2	0	0	0	0	3	0	0	2	0	0	1	0	0	0	0	2		0	0	0	4	3	3	0	0	2	1	0
75	1	2	1	0	0	0	0	1	1	5	0	0	0	0	0	1	0	0	0	0	0	0	0	0	0	0	2	0	0	0	0	3	2	1	0	0	2	0	0
80	0	0	0	0	0	0	0	0	0	3	0	0	0	0	0	0	0	0	0	0	0	0	0	0	0	0	0	0	0	0	0	2	1	0	0	0	2	0	0
85	0	0	0	0	0	0	0	0	0	2	0	0	0	0	0	0	0	0	0	0	0	0	0	0	0	0	0	0	0	0	0	2	1	0	0	0	2	0	0
90	0	0	0	0	0	0	0	0	0	1	0	0	0	0	0	0	0	0	0	0	0	0	0	0	0	0	0	0	0	0	0	1	1	0	0	0	1	0	0
95	0	0	0	0	0	0	0	0	0	1	0	0	0	0	0	0	0	0	0	0	0	0	0	0	0	0	0	0	0	0	0	1	1	0	0	0	0	0	0
100	0	0	0	0	0	0	0	0	0	0	0	0	0	0	0	0	0	0	0	0	0	0	0	0	0	0	0	0	0	0	0	1	1	0	0	0	0	0	0
Distance um	BDNF
5	1	1	1	1	1	1	1	1	1	1	1	1	1	1	1	1	1	1	1	1	1	1	1	1	1	1	1	1	1	1	1	1	1	1	1	1
10	9	10	8	5	12	8	15	15	10	6	12	8	17	7	7	9	8	8	2	2	2	5	5	2	3	5	2	2	9	9	9	14	8	9	7	11
15	17	16	9	18	16	13	19	20	15	12	19	17	21	12	15	16	18	9	6	6	11	7	15	11	7	9	8	11	12	20	18	17	13	13	12	13
20	19	16	13	26	15	16	17	19	16	14	16	19	18	14	16	16	14	9	11	10	18	10	20	18	12	14	14	16	13	24	19	16	15	14	15	12
25	16	16	13	23	12	16	13	15	14	13	11	15	12	14	11	7	8	10	15	14	20	13	19	20	15	17	16	16	14	22	15	13	15	13	15	11
30	13	12	8	19	4	13	11	11	11	10	6	11	6	12	8	1	5	12	16	17	19	15	15	19	16	17	17	14	15	19	13	11	14	12	14	10
35	10	6	3	14	2	10	6	8	8	7	4	8	4	11	4	0	3	12	17	18	17	15	10	15	15	17	16	12	15	14	12	8	13	11	12	9
40	7	2	2	9	1	7	3	6	6	5	4	6	3	10	1	0	2	12	16	18	14	12	7	11	13	15	15	12	15	8	12	7	12	9	11	7
45	5	0	1	7	0	5	0	5	5	4	4	4	2	7	0	0	1	10	15	17	12	10	6	7	11	12	14	13	14	3	10	6	10	7	11	5
50	3	0	1	4	0	3	0	5	5	3	2	1	2	5	0	0	1	8	13	15	10	7	6	3	9	10	13	14	12	3	7	5	9	5	9	2
55	2	0	0	3	0	1	0	5	4	2	0	0	0	4	0	0	0	6	11	12	7	6	6	2	8	8	11	14	11	1	4	4	7	3	8	1
60	1	0	0	2	0	0	0	4	4	1	0	1	0	2	0	0	0	5	10	8	4	5	5	1	7	7	9	13	9	0	4	3	5	2	6	1
65	1	0	0	1	0	0	0	3	4	1	3	1	0	0	0	0	0	4	9	5	2	5	4	1	7	5	8	11	7	0	1	2	4	1	4	1
70	1	0	0	1	0	0	0	2	3	1	1	0	0	0	0	0	0	3	8	3	2	4	3	0	6	1	7	9	4	0	0	2	4	1	2	1
75	0	0		2	0	0	0	1	3	0	0	0	0	0	0	0	0	1	8	2	1	3	2	0	4	0	7	9	2	0	0	2	3	1	1	0
80	0	0	0	0	0	0	0	0	3	0	0	0	0	0	0	0	0	1	7	1	0	1	2	0	3	0	6	9	0	0	0	2	2	0	1	0
85	0	0	0	0	0	0	0	0	3	0	0	0	0	0	0	0	0	0	6	1	0	0	2	0	2	0	5	10	0	0	0	3	2	0	1	0
90	0	0	0	0	0	0	0	0	2	0	0	0	0	0	0	0	0	0	5	2	0	1	2	0	2	0	3	8	0	0	0	3	0	0	1	0
95	0	0	0	0	0	0	0	0	2	0	0	0	0	0	0	0	0	0	3	1	0	1	0	0	3	0	1	5	0	0	0	3	0	0	1	0
100	0	0	0	0	0	0	0	0	1	0	0	0	0	0	0	0	0	0	2	0	0	0	1	0	2	0	0	6	0	0	0	1	0	0	0	0
Distance um	LY294002
5	1	1	1	1	1	2	1	1	1	1	1	1	1	1	2	1	1	1	1	2	1
10	2	7	6	6	7	8	7	7	4	4	5	6	6	4	4	4	5	5	5	5	6
15	8	8	7	9	8	9	8	8	8	5	9	5	10	7	6	6	6	5	8	6	6
20	9	8	8	9	8	9	9	8	9	5	9	6	11	9	8	7	6	6	9	5	7
25	8	8	8	8	6	7	9	8	8	5	8	6	11	10	9	7	7	5	10	4	6
30	8	8	9	6	5	5	7	8	5	5	9	5	10	9	9	7	7	5	11	4	6
35	8	8	9	4	4	3	5	8	3	5	10	7	8	8	8	6	7	3	11	2	4
40	6	9	10	3	3	2	4	7	2	5	9	5	5	6	7	5	7	3	10	1	3
45	4	8	9	2	2	1	2	5	2	5	6	1	3	4	6	5	7	2	7	0	3
50	2	7	7	1	2	1	1	4	2	6	5	0	3	3	5	4	5	3	4	0	3
55	0	5	4	1	1	1	1	4	2	6	5	0	3	3	4	4	3	3	2	0	3
60	0	3	2	0	1	1	0	5	2	6	4	0	2	3	3	2	2	3	1	0	3
65	0	1	2	0	1	1	0	2	1	5	3	0	2	2	3	1	2	2	1	0	3
70	0	1	1	0	1	0	0	0	1	2	0	0	0	1	2	1	2	1	1	0	2
75	0	0	0	0	2	0	0	0	1	1	0	0	0	1	2	1	1	1	0	0	1
80	0	0	0	0	2	0	0	0	0	0	0	0	0	1	0	0	0	0	0	0	1
85	0	0	0	0	1	0	0	0	0	0	0	0	0	1	0	0	0	0	0	0	0
90	0	0	0	0	0	0	0	0	0	0	0	0	0	0	0	0	0	0	0	0	0
95	0	0	0	0	0	0	0	0	0	0	0	0	0	0	0	0	0	0	0	0	0
100	0	0	0	0	0	0	0	0	0	0	0	0	0	0	0	0	0	0	0	0	0
Distance um	LY294002+BDNF
5	1	1	1	1	1	1	1	1	1	1	1	1	1	1	1	1	1	1	3	1	1	1	2	1	1	1	1	1	1	1	1	1
10	8	9	5	15	3	8	7	8	6	6	6	5	8	4	4	7	5	9	8	8	8	11	7	8	12	14	9	7	9	8	10	10
15	11	10	6	16	3	13	9	7	9	7	11	8	10	9	7	10	7	11	9	9	10	13	9	11	12	13	9	9	9	11	11	13
20	8	8	8	12	4	16	8	8	8	7	13	11	9	10	8	10	8	12	9	8	7	10	11	12	9	9	7	9	7	11	9	14
25	1	6	9	8	5	11	6	8	6	6	13	12	5	11	7	7	7	11	9	6	5	7	9	10	5	7	4	7	4	9	7	12
30	2	5	9	6	6	9	4	6	6	5	11	12	2	11	5	3	6	7	8	4	4	4	4	7	5	6	2	6	2	7	6	9
35	2	3	8	5	6	2	4	4	6	5	8	11	1	11	3	1	5	3	6	3	3	2	1	5	1	6	2	5	2	4	5	6
40	1	2	5	4	6	0	3	2	5	2	5	9	2	8	3	0	5	1	3	2	2	2	2	4	0	5	2	3	2	2	5	4
45	0	2	3	3	6	0	3	2	4	1	3	7	2	5	3	0	4	0	2	2	2	2	1	2	0	4	2	2	2	1	4	3
50	0	2	2	2	6	0	2	1	3	0	3	5	2	3	2	0	4	1	1	2	1	2	1	0	0	3	2	2	2	1	3	2
55	0	2	1	1	5	0	1	1	2	0	2	3	0	2	2	0	3	1	1	2	1	2	0	0	0	2	1	2	2	2	2	1
60	0	3	1	1	4	0	0	0	1	0	1	2	0	3	2	0	3	1	1	2	0	1	0	0	0	1	1	2	2	1	1	1
65	0	3	1	1	3	0	0	0	1	0	1	1	0	1	2	0	3	1	1	2	0	1	0	0	0	1	1	3	1	1	1	1
70	0	2	1	0	1	0	0	0	0	0	0	0	0	0	1	0	3	1	1	2	0	1	0	0	0	0	1	1	1	0	0	1
75	0	1	1	0	1	0	0	0	0	0	0	0	0	0	0	0	3	0	1	2	0	0	0	0	0	0	1	0	1	0	1	1
80	0	1	0	0	2	0	0	0	0	0	0	0	0	0	0	0	2	0	2	0	0	0	0	0	0	0	2	0	1	0	1	1
85	0	0	0	0	0	0	0	0	0	0	0	0	0	0	0	0	1	0	0	0	0	0	0	0	0	0	2	0	1	0	2	1
90	0	0	0	0	0	0	0	0	0	0	0	0	0	0	0	0	1	0	0	0	0	0	0	0	0	0	2	0	1	0	2	1
95	0	0	0	0	0	0	0	0	0	0	0	0	0	0	0	0	0	0	0	0	0	0	0	0	0	0	2	0	1	0	2	1
100	0	0	0	0	0	0	0	0	0	0	0	0	0	0	0	0	0	0	0	0	0	0	0	0	0	0	1	0	1	0	2	1
