# Supplementary material for: BDNF/TrkB signaling endosomes in axons coordinate CREB/mTOR activation and protein synthesis in the cell body to induce dendritic growth in cortical neurons
Source: eLife. 2023 Feb 24;12:e77455. doi: 10.7554/eLife.77455 (PMC9977295; doi:10.7554/eLife.77455)
Supplement: Figure 7—source data 1. [file elife-77455-fig7-data1.xlsx]

## Sheet: Figure 7C
Number of primary dendrites
	Control	BDNF	LY	LY+BDNF
	4	11	9	12
	4	11	9	13
	3	10	11	11
	5	8	6	9
	5	10	8	13
	4	7	5	9
	7	11	7	5
	5	7	9	15
	5	7	8	9
	6	7	11	7
	3	9	9	10
	7	10	8	8
	3	13	7	8
	4	6	6	11
	5	7	6	7
	6	9	5	9
	8	7	5	7
	7	9	9	11
	5	10	8	5
	5	9	7	9
	7	8	7	9
	4	5	6	6
	4	12	9	13
	7	11	7	12
	6	10	8	17
	6	14	6	9
	6	10	5	12
	10	7	8	17
	8	8		7
	8	11		5
	8	12		7
	6	12		12
	5	8		12
	5	11		10
	6	7		14
	5	11		8
	8	8		8
	11	10		11
	7	10		8
	8	14		9
	5	17
	9	7
	5	9
	5	9
	3	7
	10	7
	8	11
		8
		14
Average	5.97872	9.5102	7.46429	9.85
Standard Dev	1.93918	2.43347	1.68835	3.00896
Standard Error	0.282858	0.354958	0.319068	0.475759

## Sheet: Figure 7D
Branching points
	Control	BDNF	LY	LY+BDNF
	6	12	11	13
	6	11	10	14
	6	16	6	22
	7	8	6	21
	7	14	8	10
	6	11	6	7
	6	14	6	12
	10	13	12	19
	7	7	8	14
	9	10	14	7
	3	10	8	10
	6	7	5	13
	8	12	10	11
	6	8	6	4
	6	9	8	2
	5	11	9	4
	5	11	7	8
	10	11	9	9
	8	10	10	6
	4	10	9	13
	6	13	11	11
	4	14	10	6
	3	19	8	10
	4	11	10	9
	6	7	9	10
	5	9	7	10
	7	8	6	12
	6	9	7	8
	6	13	6	8
	13	11		7
	5	12		14
	10	17		11
	4	16		11
	6	15		15
	5	17		12
	3	7		10
	9	19		13
	3	14		10
	3	10		7
	4	15
	6	7
	4	14
	3	14
	6	5
	5	12
	6	10
	4	14
		16
Average	5.89362	11.7292	8.34483	10.5897
Standard Dev	2.15925	3.33096	2.1593	4.216
Standard Error	0.318364	0.491123	0.400971	0.6751

## Sheet: Figure 7E
Sholl
Distance um	Control
5	1	3	6	4	3	5	1	2	2	2	2	1	1	1	3	2	3	1	1	1	1	1	1	2	1	1	1	3	1	1	1	1	1	1	1	1	1
10	6	4	7	7	5	5	4	2	3	3	4	1	5	2	7	3	7	3	9	5	7	3	6	6	5	3	9	8	7	3	6	7	5	3	3	9	5
15	5	3	1	7	5	4	4	2	3	5	4	1	4	3	5	2	6	5	10	6	8	4	13	5	6	4	9	7	9	9	6	10	6	5	3	13	4
25	7	5	1	7	8	4	4	2	2	6	4	2	4	4	4	2	4	6	13	10	6	5	15	7	5	3	10	10	9	11	4	12	7	4	3	10	5
25	6	7	1	5	8	4	5	3	4	5	5	2	6	3	2	3	4	3	8	9	8	5	10	5	5	4	6	7	9	7	8	11	8	5	3	7	8
30	5	6	1	4	7	4	7	3	6	5	4	3	5	7	1	4	3	2	6	7	7	7	3	5	5	3	5	8	10	7	8	10	6	5	2	3	6
35	5	7	1	4	8	3	6	4	7	5	3	2	6	9	1	4	2	7	3	6	4	6	1	3	4	2	6	9	10	6	5	7	6	3	2	3	5
40	4	6	2	2	5	3	6	4	8	6	3	2	5	7	1	2	2	6	3	6	4	6	0	3	3	2	6	6	7	5	6	6	4	4	3	2	3
45	3	4	2	2	6	3	7	3	5	7	4	2	5	4	1	2	2	5	2	4	3	6	0	4	2	3	5	5	9	4	6	4	3	4	3	2	3
50	3	4	1	2	2	3	5	3	5	6	4	2	5	1	1	2	2	3	2	4	1	5	0	3	2	4	4	5	7	3	5	3	3	2	3	1	3
55	3	2	1	2	3	2	4	2	7	5	4	3	4	1	2	3	3	3	2	4	0	5	0	3	4	2	4	4	6	2	4	3	3	2	3	1	3
60	3	0	1	2	1	1	4	1	4	4	3	2	4	1	2	3	3	4	3	2	0	4	0	2	4	2	2	4	5	2	2	2	3	1	3	1	2
65	1	0	2	1	2	1	4	1	5	4	2	2	4	1	2	3	3	2	4	1	0	5	0	2	6	2	0	3	4	2	1	1	3	0	5	1	1
70	1	0	1	1	2	1	4	1	4	4	1	2	4	1	4	2	2	2	2	1	0	3	0	1	2	1	0	3	4	2	0	1	3	0	4	0	2
75	0	0	4	1	2	1	3	2	4	3	1	2	4	1	1	2	2	2	2	1	0	3	0	1	3	1	0	2	3	1	0	1	2	0	3	0	2
80	0	0	2	1	2	1	1	2	3	2	1	2	3	1	1	1	3	2	1	1	0	3	0	1	1	1	0	2	1	1	0	1	2	0	3	0	2
85	0	0	2	1	2	1	1	3	3	2	1	2	3	2	1	1	1	2	1	1	0	3	0	1	1	1	0	2	0	1	0	0	2	0	3	0	2
90	0	0	2	1	2	1	0	2	0	2	1	2	2	1	1	1	1	2	1	1	0	2	0	1	0	1	0	2	0	1	0	0	1	0	4	0	1
95	0	0	2	1	2	1	0	0	0	1	1	2	3	1	1	1	1	3	1	1	0	2	0	0	0	1	0	2	0	1	0	0	0	0	3	0	2
100	0	0	2	1	2	2	0	0	0	1	1	2	1	2	1	1	1	1	1	2	0	2	0	0	0	1	0	1	0	1	0	0	0	0	3	0	2
Distance um	BDNF
5	1	1	1	4	1	2	1	2	1	1	2	2	1	1	1	2	4	1	1	1	1	1	1	1	1	1	1	1	3	2	1	1	3	3	3	1	5	4	1	6
10	9	11	6	4	7	7	5	5	6	8	4	6	9	11	4	4	3	7	11	4	6	3	7	3	10	10	7	5	2	6	11	10	8	6	4	3	7	6	6	8
15	7	13	1	1	1	1	1	1	1	1	1	1	10	11	9	6	4	14	14	6	11	7	8	6	14	7	9	9	5	9	15	15	18	6	5	2	10	8	8	10
25	9	9	7	11	4	6	3	7	3	10	10	7	8	7	9	6	3	14	18	4	13	9	10	8	10	9	14	9	8	8	13	15	14	5	11	3	11	6	12	8
25	10	8	14	14	6	11	7	8	6	14	7	9	6	4	6	4	6	11	22	5	17	12	7	9	14	10	11	5	11	8	11	13	12	9	16	2	13	7	16	7
30	6	5	14	18	4	13	9	10	8	10	9	14	6	2	5	2	4	7	18	6	17	12	6	10	14	10	14	6	13	8	7	11	13	10	13	6	11	4	16	5
35	1	2	11	22	5	17	12	7	9	14	10	11	7	2	6	2	5	5	18	5	17	12	8	10	12	9	13	4	12	6	5	8	10	10	13	3	8	1	16	6
40	4	2	7	18	6	17	12	6	10	14	10	14	7	2	4	2	6	4	15	6	12	7	6	9	7	5	12	2	12	6	4	8	8	14	13	4	9	1	14	5
45	6	3	5	18	5	17	12	8	10	12	9	13	8	2	2	2	8	5	13	6	10	4	5	8	6	6	10	2	12	6	5	7	6	14	17	5	8	1	12	4
50	6	2	4	15	6	12	7	6	9	7	5	12	9	3	5	2	6	3	11	6	10	4	6	8	3	4	5	1	10	4	3	5	5	12	8	3	8	1	11	2
55	5	2	5	13	6	10	4	5	8	6	6	10	7	2	1	3	4	2	8	4	11	3	5	7	2	5	8		8	2	3	6	2	11	10	3	8	1	8	3
60	4	2	3	11	6	10	4	6	8	3	4	5	8	2	1	2	4	3	7	2	8	5	5	6	1	3	4		7	1	2	5	2	11	6	6	6	1	8	1
65	4	2	2	8	4	11	3	5	7	2	5	8	7	3	1	2	2	3	4	2	7	5	5	6	1	2	3		6	1	2	6	2	6	8	4	5	4	10	1
70	4	2	3	7	2	8	5	5	6	1	3	4	7	3	0	2	2	3	4	4	6	4	3	5	1	2	2		5	1	2	5	2	5	3	8	3	1	8	1
75	3	2	3	4	2	7	5	5	6	1	2	3	6	4	0	2	1	3	2	3	2	3	3	5	1	2	2		3	1	3	4	2	4	3	4	3	1	6	1
80	5	2	3	4	4	6	4	3	5	1	2	2	3	5	0	2	1	1	2	2	2	4	2	4	1	5	2		3	1	2	3	1	5	3	4	2	1	4	3
85	4	3	3	2	3	2	3	3	5	1	2	2	3	5	0	2	1	1	2	3	2	4	3	3	1	2	1		2	4	2	2	1	1	1	4	6	0	4	3
90	6	3	1	2	2	2	4	2	4	1	5	2	2	4	0	3	1	1	3	4	2	2	3	3	1	2	2		2	1	2	1	0	1	1	4	1	0	4	2
95	4	3	1	2	3	2	4	3	3	1	2	1	2	2	0	5	1	1	3	3	1	3	4	3	0	3	2		2	1	2	1	0	1	0	3	0	0	4	3
100	2	2	1	3	4	2	2	3	3	1	2	2	2	3	0	2	0	1	3	2	1	2	3	3	0	3	1		2	1	4	2	0	1	0	3	0	0	4	1
Distance um	LY294002
5	3	2	2	3	2	1	1	1	1	1	1	1	1	1	1	1	1	1	1	1	1
10	7	4	4	4	6	2	5	4	2	3	5	2	2	2	3	6	2	4	3	2	8
15	9	9	11	6	8	5	7	9	8	11	9	3	7	5	5	9	4	6	6	8	9
25	8	10	8	7	10	6	7	11	10	14	9	4	8	6	6	9	7	7	8	12	9
25	7	10	6	6	8	6	6	12	8	14	8	5	10	6	8	9	9	7	9	13	9
30	5	7	4	5	4	8	7	11	8	12	7	5	12	6	8	8	10	7	9	11	8
35	3	5	3	5	2	11	6	13	8	8	5	6	14	6	9	6	9	7	7	9	8
40	2	5	2	4	2	8	6	10	8	6	4	6	13	5	9	6	7	7	6	8	7
45	1	3	1	4	2	8	6	9	7	4	3	6	12	4	9	6	5	7	4	8	7
50	1	3	1	4	2	7	6	10	5	4	3	6	9	2	8	6	4	7	2	8	6
55	1	2	1	2	2	7	6	8	3	5	3	5	8	1	8	7	2	8	1	8	5
60	1	3	1	1	2	5	5	8	3	4	2	5	6	1	7	7	2	8	1	7	4
65	1	4	1	1	2	7	5	10	2	2	2	4	5	1	7	7	2	8	1	7	3
70	1	4	1	1	2	7	4	9	2	2	2	4	5	1	6	5	2	8	1	5	2
75	1	6	1	1	2	6	5	9	1	3	2	4	4	1	5	4	2	8	1	4	2
80	1	4	1	1	2	5	5	8	0	2	2	4	3	0	4	2	1	8	1	3	1
85	1	4	1	2	3	4	5	7	0	1	2	4	2	0	3	1	1	7	1	2	1
90	1	4	0	2	3	4	5	5	0	2	2	2	1	0	3	1	1	6	1	1	1
95	1	4	0	2	3	3	5	4	0	2	2	0	1	0	2	1	1	5	1	1	1
100	2	4	0	2	2	3	4	4	0	2	2	1	1	0	2	1	1	5	1	1	1
Distance um	LY294002+BDNF
5	1	2	1	3	1	6	3	1	4	3	3	2	4	1	2	2	1	2	2	2	2	2	1	1	1	1	1	1	1	1	1	1	1	1	1	1	1	1	1	1
10	10	12	13	12	13	5	4	13	9	6	9	10	5	9	2	4	7	10	3	4	5	6	8	4	1	4	6	6	6	6	6	2	1	4	3	1	3	1	2	3
15	9	16	20	11	12	7	5	18	10	9	11	14	8	11	9	4	7	14	4	4	6	9	8	13	9	12	7	17	6	4	6	10	10	6	14	11	8	10	9	3
25	9	15	31	11	13	10	5	19	16	8	10	15	10	11	9	5	6	10	4	7	6	11	10	15	18	10	13	17	6	4	6	14	11	11	21	7	9	13	9	7
25	11	13	21	12	8	7	6	14	8	7	7	13	9	10	6	4	4	8	5	5	4	12	10	11	23	9	13	13	7	3	6	11	12	11	15	5	11	15	9	7
30	9	11	29	13	11	5	11	10	8	6	7	5	7	11	6	5	3	7	5	6	6	10	9	13	26	10	14	14	8	3	10	10	17	11	14	5	9	15	9	8
35	10	8	16	11	4	6	9	11	5	5	4	6	7	10	5	4	2	9	4	7	3	10	7	12	20	10	15	9	9	3	9	12	13	8	13	5	9	13	9	9
40	7	5	8	10	4	5	5	6	3	6	4	3	7	8	4	4	3	7	3	7	4	5	5	11	12	8	15	6	7	3	8	11	8	7	11	6	4	11	9	8
45	6	3	6	7	2	4	6	4	4	6	3	3	8	7	3	4	6	7	4	8	3	6	5	12	2	6	16	4	9	3	8	8	5	5	7	8	3	9	9	8
50	5	1	5	6	2	1	5	3	2	3	3	3	8	9	3	4	6	5	3	10	2	6	4	11	2	4	15	2	10	3	5	5	3	4	8	7	4	4	6	7
55	6	0	4	3	2	1	7	2	2	2	3	4	5	7	2	4	5	3	2	10	1	6	2	11	1	4	14	1	8	2	3	2	3	4	5	8	3	3	4	7
60	4	0	4	4	2	1	7	4	3	2	2	4	2	6	2	4	5	2	1	9	1	5	2	11	1	2	11	1	7	2	3	2	2	3	5	8	2	3	3	8
65	4	0	3	5	0	1	6	3	3	1	2	3	3	4	2	4	5	2	2	6	1	5	2	12	1	2	8	1	7	2	2	1	2	3	3	9	0	3	3	6
70	2	0	3	4	0	1	4	2	1	0	1	3	3	3	2	3	5	1	1	6	1	4	2	12	1	2	6	1	5	2	3	1	1	2	2	9	0	2	2	7
75	1	0	3	3	0	1	2	2	1	0	1	1	2	3	1	3	5	1	0	5	1	5	1	12	1	2	5	1	5	1	3	1	1	2	2	8	0	2	2	7
80	1	0	2	2	0	1	3	1	1	0	4	1	1	3	1	3	4	1	0	6	1	2	1	9	1	1	5	1	5	1	2	0	1	2	1	4	0	1	2	7
85	1	0	1	0	0	1	2	1	2	0	1	1	1	2	1	3	4	1	0	4	1	4	1	9	1	1	4	1	3	1	2	0	0	2	1	3	0	1	1	7
90	1	0	1	0	1	1	3	1	1	0	1	0	2	2	1	2	6	1	0	2	1	1	1	7	1	1	2	1	3	1	2	0	0	2	1	2	0	1	0	7
95	0	0	0	0	0	1	3	1	1	0	1	0	2	2	1	3	5	1	0	1	1	1	1	6	1	1	2	1	3	3	2	0	0	2	0	1	0	1	0	7
100	0	0	0	0	0	1	1	0	1	0	1	0	2	2	1	2	6	2	0	1	1	1	1	4	1	1	2	1	2	2	1	0	0	3	0	1	0	1	0	7

## Sheet: Figure 7G
QD positive vesicles every 900 um2
	QD	BDNF-QD	BDNF-QD+LY
	1.56819	20.5294	30.914
	0.498949	15.2369	13.653
	1.65617	17.6237	16.2467
	0.869447	23.1977	14.5834
	0.531481	20.876	29.693
	1.47959	20.4019	32.1561
	1.04131	20.3297	58.0414
	0.791659	20.6381	50.5684
	1.41375	28.245	32.7973
	1.01544	27.8527	20.4112
		11.9084	25.6355
		47.2895	9.67337
		14.4131	6.25614
		21.6574	19.3609
		31.335	8.90905
		27.1947	24.8268
		44.0886	38.0225
		33.2709	10.9618
			14.5282
			21.5741
			33.7252
			5.01193
			3.83797
			14.285
			17.4837
			1.38394
Average	1.0866	24.7827	21.3285
Standard Dev	0.423289	9.51459	14.0241
Standard Error	0.133856	2.24261	2.75035

## Sheet: Figure 7J
Number of primary dendrites
	Control	BDNF	LY/Control	LY/BDNF
	8	7	5	8
	5	11	6	8
	7	12	8	8
	5	9	7	5
	5	13	8	7
	7	8	8	8
	4	9	8	5
	7	7	7	6
	6	10	6	4
	6	9	4	8
	5	9	6	11
	3	11	5	6
	8	15	5	7
	4	5	8	9
	6	11	5	13
	7	8	8	7
	5	7	7	7
	6	6	10	6
	11	12	8	8
	4	9	7	7
	12	10	8	8
	4	11	6	10
	9	12	9	7
	4	9	8	14
	6	7	8	7
	4		6	8
	6		3	9
	6		6
	6		7
	9		9
Average	6.16667	9.48	6.86667	7.81481
Standard Dev	2.10227	2.36502	1.59164	2.21944
Standard Error	0.38382	0.473005	0.290593	0.427132

## Sheet: Figure 7K
Branching points
	Control	BDNF	LY/Control	LY/BDNF
	5	5	5	12
	5	10	9	7
	3	12	4	6
	2	11	6	5
	4	16	3	5
	7	6	3	5
	5	8	7	7
	4	9	3	3
	6	20	2	5
	3	14	6	6
	2	10	8	7
	6	11	4	4
	6	18	4	6
	5	9	10	8
	9	10	7	14
	6	11	7	11
	8	8	13	8
	6	14	9	7
	6	13	5	3
	4	9	8	6
	12	10	4	6
	4	10	9	8
	6	14	4	4
	9	8	8	5
	6	5	5	5
	8		5	6
	6		3	9
	4		6
	3		4
	10		6
Average	5.66667	10.84	5.9	6.59259
Standard Dev	2.33907	3.69324	2.53731	2.57591
Standard Error	0.427054	0.738647	0.463247	0.495735

## Sheet: Figure 7L
Sholl
Distance um	Veh/Control
5	1	1	1	1	1	2	1	1	1	1	1	1	1	1	1	1	1	1	1	1	1	1	1	1	1	1	1	1	1	1
10	7	2	3	5	6	6	5	7	6	4	5	2	5	3	5	3	6	6	11	7	3	2	10	7	2	4	3	6	3	7
15	9	2	6	6	5	7	5	7	6	6	6	3	7	3	6	5	4	6	15	6	17	4	10	5	5	4	4	6	6	12
25	11	3	7	7	7	12	5	6	11	6	6	3	7	4	5	10	4	10	16	6	16	2	9	5	8	5	6	7	6	11
25	7	3	6	5	6	12	4	9	8	5	6	6	7	6	6	9	5	10	11	6	16	4	8	6	5	6	7	6	7	11
30	4	5	5	3	4	7	4	5	8	4	5	5	10	6	6	6	6	10	9	3	12	3	8	5	5	4	7	5	8	13
35	2	5	4	3	2	6	3	4	7	4	4	2	9	5	7	6	5	7	8	3	11	4	4	6	6	4	8	4	6	8
40	3	6	3	3	2	4	3	3	6	4	3	3	9	6	7	5	6	5	6	2	9	3	3	5	4	3	5	5	4	5
45	1	4	2	3	2	2	3	3	2	4	3	3	8	4	6	4	5	5	6	2	5	3	3	5	3	6	4	5	4	1
50	0	5	2	3	2	1	4	4	1	3	3	1	8	3	7	5	6	4	5	2	4	2	3	5	3	5	4	4	2	0
55	0	7	2	3	1	1	6	2	0	4	3	1	6	2	7	3	7	4	4	2	2	2	3	4	3	2	5	4	2	0
60	0	4	2	2	1	2	4	2	0	6	2	1	5	2	6	2	7	4	0	1	2	1	2	2	2	3	4	4	2	0
65	0	3	1	2	0	2	3	1	0	4	1	1	3	1	6	2	3	2	0	1	2	1	1	2	2	3	3	4	2	0
70	0	1	1	2	0	0	4	1	0	2	1	0	2	1	6	2	2	2	0	1	2	1	1	2	2	3	2	4	1	0
75	0	0	1	2	0	0	3	1	0	2	1	0	2	1	6	2	2	1	0	2	1	1	1	2	1	1	2	3	0	0
80	0	0	1	2	0	0	3	1	0	2	1	0	2	1	5	1	2	1	0	2	1	1	1	3	1	1	3	2	0	0
85	0	0	1	2	0	0	3	1	0	1	1	0	2	1	4	2	2	1	0	2	1	1	1	3	1	1	2	1	0	0
90	0	0	1	2	0	0	1	1	0	1	0	0	1	1	3	1	2	1	0	1	1	1	1	2	1	1	0	1	0	0
95	0	0	1	2	0	0	0	1	0	2	0	0	1	1	2	1	3	1	0	1	2	1	0	2	2	1	0	0	0	0
100	0	0	1	2	0	0	0	2	0	0	0	0	1	1	4	1	2	1	0	1	4	1	0	2	2	1	0	0	0	0
Distance um	BDNF
5	1	1	1	1	1	1	1	1	1	1	1	1	1	2	1	1	1	1	1	1	1	1	1	1	1
10	8	6	7	8	8	6	6	7	11	6	5	6	10	2	8	6	7	6	6	7	5	5	12	6	6
15	9	9	8	12	12	6	9	9	13	12	9	9	18	4	10	9	8	9	14	9	7	12	14	10	8
25	8	12	13	11	14	7	12	7	18	15	12	13	23	4	12	10	10	11	17	8	9	10	17	11	7
25	6	13	16	9	18	6	8	6	16	14	13	12	16	6	9	8	10	8	18	8	10	11	16	10	5
30	5	11	15	7	19	6	8	7	16	10	11	11	13	7	7	6	9	4	15	9	11	11	10	9	5
35	5	9	11	6	20	5	8	8	13	6	7	9	6	6	6	2	7	10	14	8	9	10	13	9	7
40	4	8	7	4	15	5	6	7	12	3	4	6	7	5	4	1	7	7	10	8	9	7	8	8	8
45	4	1	3	3	11	5	5	3	8	1	4	2	5	6	4	1	3	5	7	7	8	6	7	7	4
50	2	0	2	1	12	5	4	1	5	0	4	2	4	8	4	1	2	5	4	6	7	5	8	6	5
55	0	0	3	2	11	2	5	1	3	0	4	1	4	3	2	1	3	5	2	5	3	4	4	5	5
60	0	0	3	1	8	1	6	1	2	0	3	2	5	3	2	1	1	3	2	4	3	1	4	4	4
65	0	0	2	1	5	1	6	1	1	0	2	2	5	3	1	2	2	4	2	4	3	0	3	3	4
70	0	0	1	1	3	1	5	2	1	0	2	1	4	2	0	2	2	3	2	3	3	0	3	1	1
75	0	0	1	1	1	1	3	2	0	0	3	1	1	1	0	2	3	3	2	2	3	0	2	0	1
80	0	0	0	1	1	1	2	2	0	0	3	1	0	2	0	3	3	4	0	1	2	0	1	0	1
85	0	0	0	1	2	1	1	3	0	0	1	1	0	1	0	3	2	4	0	1	1	0	0	0	0
90	0	0	0	1	1	2	0	2	0	0	1	1	0	1	0	3	2	3	0	1	1	0	0	0	0
95	0	0	0	1	1	2	0	1	0	0	0	1	0	0	0	3	2	1	0	1	1	0	0	0	0
100	0	0	0	1	1	1	0	0	0	0	0	2	0	0	0	3	1	1	0	0	1	0	0	0	0
Distance um	LY/Control
5	1	1	1	1	1	2	1	1	1	1	1	1	1	1	1	1	1	1	1	1	1	1	1	1	1	1	1	1	1	1
10	6	5	8	9	6	6	5	7	4	4	6	5	5	5	5	7	4	4	9	5	6	6	6	8	8	6	3	4	5	6
15	5	6	9	10	10	9	8	9	6	7	7	7	4	6	6	9	12	8	9	9	8	8	8	8	10	7	2	6	8	9
25	5	7	9	5	9	6	11	7	6	7	9	7	4	5	6	11	14	10	10	10	8	8	9	10	7	7	3	7	7	7
25	6	9	4	5	5	7	9	6	6	7	10	3	3	7	5	10	13	14	10	11	9	7	10	6	7	7	3	5	7	7
30	5	11	0	4	4	7	5	5	6	5	8	3	4	5	6	5	11	13	6	11	7	5	10	5	5	6	4	5	6	6
35	5	7	0	4	2	6	6	4	4	4	5	2	4	7	6	2	9	10	7	11	5	4	9	4	6	6	4	6	6	5
40	4	5	0	1	2	4	4	2	4	3	4	2	4	6	6	1	8	9	7	11	5	2	7	3	5	7	4	4	7	4
45	4	5	0	0	2	4	5	2	3	2	3	2	4	5	6	1	6	7	7	9	4	3	5	1	4	6	4	3	5	3
50	4	5	0	0	2	2	4	0	2	2	2	3	3	5	5	1	4	4	5	5	3	3	3	1	3	5	4	2	3	2
55	2	4	0	0	2	1	5	0	1	0	1	2	3	3	5	1	1	4	5	1	1	4	2	1	3	6	2	0	2	1
60	0	4	0	0	1	1	5	0	1	0	1	1	2	4	4	1	0	4	3	1	0	2	2	1	2	6	2	0	1	1
65	0	4	0	0	1	1	4	0	1	0	1	1	3	4	3	2	0	2	3	0	0	2	2	0	1	5	2	0	1	1
70	0	1	0	0	1	1	1	0	1	0	0	1	4	4	2	2	0	1	1	0	0	1	1	0	2	3	2	0	0	1
75	0	1	0	0	1	2	1	0	1	0	0	2	0	2	2	2	0	1	0	0	0	1	1	0	2	2	3	0	0	0
80	0	1	0	0	1	1	2	0	0	0	0	2	0	2	2	1	0	1	0	0	0	1	1	0	2	1	1	0	0	0
85	0	1	0	0	1	0	2	0	0	0	0	1	0	2	0	1	0	1	0	0	0	2	1	0	2	1	1	0	0	0
90	0	1	0	0	1	0	2	0	0	0	0	1	0	1	0	1	0	1	0	0	0	2	1	0	2	1	1	0	0	0
95	0	1	0	0	2	0	1	0	0	0	0	1	0	1	0	1	0	2	0	0	0	3	1	0	1	1	1	0	0	0
100	0	1	0	0	2	0	2	0	0	0	0	1	0	0	0	0	0	1	0	0	0	6	1	0	1	1	1	0	0	0
Distance um	LY/BDNF
5	1	1	1	1	1	1	2	1	2	1	1	1	2	1	1	1	1	1	1	1	1	1	1	1	1	1	1	1
10	8	7	7	6	4	6	8	5	3	4	7	8	4	7	2	11	6	6	7	7	7	6	3	7	14	5	4	9
15	10	9	10	8	5	5	8	5	5	4	10	11	5	9	10	15	9	9	6	10	10	7	5	7	14	8	6	12
25	14	10	12	8	7	5	8	9	5	4	6	14	7	12	7	16	10	10	9	7	6	9	7	4	13	8	8	13
25	14	8	13	6	8	6	8	8	9	3	6	11	6	9	5	15	9	8	9	5	6	10	11	2	12	7	12	12
30	13	7	9	5	6	8	7	7	7	4	6	8	6	9	5	13	6	8	6	6	6	10	11	1	11	6	9	10
35	12	2	10	5	6	7	4	4	6	3	4	7	6	7	5	12	2	8	6	6	5	11	13	1	10	4	7	13
40	10	4	9	3	4	5	4	2	6	1	4	5	6	4	5	10	2	7	6	6	3	8	13	1	9	5	5	10
45	8	2	5	2	4	2	5	2	5	1	3	3	4	3	2	6	2	6	6	4	2	4	12	1	8	3	2	9
50	7	3	3	1	4	1	4	1	5	1	2	2	2	4	1	4	2	5	5	4	1	4	12	1	3	1	1	8
55	5	2	3	1	3	1	1	1	4	1	2	0	2	4	1	2	2	3	4	1	1	3	5	1	2	2	1	2
60	3	1	1	1	1	1	1	1	4	1	1	0	2	3	1	2	2	3	2	1	0	2	4	1	2	0	0	2
65	4	2	1	2	1	1	0	3	3	1	1	0	2	3	1	0	3	3	3	1	0	3	1	1	1	0	0	2
70	1	2	1	1	1	1	0	2	3	1	1	0	2	3	2	0	2	2	2	2	0	2	2	1	0	0	0	0
75	0	2	0	1	1	0	0	1	3	1	1	0	2	3	3	0	3	1	2	0	0	2	1	1	0	0	0	0
80	0	1	0	2	1	0	0	1	3	1	1	0	2	2	3	0	3	0	2	0	0	2	1	1	0	0	0	0
85	0	1	0	1	1	0	0	1	2	2	1	0	1	2	3	0	2	0	2	0	0	1	1	1	0	0	0	0
90	0	1	0	0	1	0	0	1	2	2	2	0	1	1	1	0	1	0	2	0	0	1	1	1	0	0	0	0
95	0	1	0	0	1	0	0	1	3	2	0	0	1	1	1	0	2	0	1	0	0	0	0	1	0	0	0	0
100	0	1	0	0	1	0	0	1	2	1	0	0	0	1	1	0	1	0	0	0	0	0	0	3	0	0	0	0
