# Supplementary material for: BDNF/TrkB signaling endosomes in axons coordinate CREB/mTOR activation and protein synthesis in the cell body to induce dendritic growth in cortical neurons
Source: eLife. 2023 Feb 24;12:e77455. doi: 10.7554/eLife.77455 (PMC9977295; doi:10.7554/eLife.77455)
Supplement: Figure 8—figure supplement 1—source data 1. — Graph B´s raw data. [file elife-77455-fig8-figsupp1-data1.xlsx]

## Sheet: Graph B
pS6r levels
	Control	BDNF
	0.574106	8.49379
	0.449446	1.67849
	1.21702	0.978996
	1.36608	1.27401
	0.570849	0.861103
	1.00185	2.2359
	2.57142	6.97718
	0.977734	2.22037
	3.83248	0.906394
	0.908383	1.10681
	0.794084	0.758447
	1.2128	0.857361
	0.606386	4.43765
	1.27687	1.31489
	0.799059	3.89498
	1.02921	1.62434
	1.30012	12.5453
	0.584166	2.85946
	0.62129	4.70845
	0.877791	1.30994
	1.4041	4.58802
	0.754881	2.23377
	0.726291	1.54438
	0.545643	3.09519
	0.725839	1.0129
	0.682408	0.709324
	3.10061	1.34802
	0.493704	1.4312
	0.317695	1.20431
	0.363318	0.607462
	0.973719	12.9692
	0.406812	6.5669
	0.450582	5.1647
	0.48325	4.80271
		2.02275
		5.3784
		9.91862
		6.07437
		2.23899
		2.19159
		0.733178
		1.04325
		1.44808
		0.928159
		1.28963
		1.68732
		2.41182
		1.34669
Average	1	3.06323
Standard Dev	0.764255	2.9881
Standard Error	0.131069	0.431295
