# Supplementary material for: BDNF/TrkB signaling endosomes in axons coordinate CREB/mTOR activation and protein synthesis in the cell body to induce dendritic growth in cortical neurons
Source: eLife. 2023 Feb 24;12:e77455. doi: 10.7554/eLife.77455 (PMC9977295; doi:10.7554/eLife.77455)
Supplement: Figure 8—source data 1. [file elife-77455-fig8-data1.xlsx]

## Sheet: Figure 8B
p4E-BP1 levels curve			BDNF
Time course min	0	30	90	180	360
	1.243	0.548356	5.86164	6.55312	2.57754
	1.146	0.853149	2.10247	3.03178	2.11681
	0.792118	1.62727	2.954	1.77161	1.35325
	0.880946	0.347579	2.23821	4.99797	3.06467
	0.443762	0.645212	5.31248	5.05068	2.70032
	1.25648	0.928287	0.603163	1.54965	1.97852
	2.12626	0.00109529	2.52355	2.50158	1.75726
	0.112508	2.37667	1.88469	5.37316	0.577281
	1.01234	1.90887	1.56513	7.06034	1.18727
	1.52942	1.35975	4.28327	1.14408	1.09448
	1.12462	2.69347	0.766691	1.62581	1.82352
	0.812461	0.71698	3.83133	2.17015	1.68925
	0.912435	1.72754	0.836664	3.00968	1.93258
	0.932273	1.19012	0.836664	2.51913	1.61232
	1.04394	1.38232	2.29575	2.12964	1.81261
	1.03258	1.51274	1.88329	1.56918	1.72469
			3.81169	1.48548	1.92359
			3.00655	6.34449
				1.69195
				1.54538
Average	1.02507	1.23871	2.58874	3.15624	1.81918
Standard Dev	0.440104	0.731888	1.53857	1.9558	0.601918
Standard Error	0.110026	0.182972	0.362644	0.437329	0.145987

## Sheet: Figure 8E
pE-BP1 levels inhibitors
	Control	BDNF	Cilio D	Cilio D + BDNF	LY	LY/BDNF	Torin	Torin/BDNF
	0.961	3.763	0.948758	1.31577	1.02863	1.75124	1.79081	1.97961
	0.719	1.6	1.70762	1.469	1.53927	0.680227	0.663536	0.910811
	0.814	2.931	0.676696	0.810057	1.09783	1.09459	0.713184	0.864577
	0.775	3.833	0.781841	0.347868	1.31685	1.72021	1.11299	2.00672
	0.839	2.012	1.35433	0.834523	0.936824	0.483315	1.43193	1.18855
	0.617	2.502	0.358882	1.36983	0.905121	1.77448	3.20511	0.84122
	1.79	1.42	1.53386	0.79058	1.03947	1.68718	0.789953	0.989126
	1.327	1.102	1.34712	0.574848	0.859661	2.46678	1.0558	0.758221
	0.911	0.723	1.28009	1.63038	3.46353	1.20788	1.06237	1.26472
	0.979	2.203	0.935583	1.78341	1.94284	2.15332	0.891728	0.823888
	0.833	1.079	0.628391	0.50428	0.617945	0.476035	2.00718	1.49243
	0.265	1.813	1.73772	0.718217	0.747498	0.51509	1.20546	1.67973
	1.112	3.09	0.751904	1.27433	0.911467	0.51671	1.82124	1.654
	0.944	2.124	0.613276	1.01216	0.73749	0.503798	0.704226	0.800063
	0.401	1.541	0.112644	0.681087	1.83951	0.999484	1.17835	0.465282
	1.118	0.728	1.46897	1.08998	1.44615	1.12466	1.7711	0.845086
	0.674	0.608	1.37134	1.3573	1.69367	1.5692	0.923518	0.720916
	1.469	0.773	0.809984	0.914516	0.543948	2.00708	0.932024	1.01286
	1.642	2.343	0.130822	0.54084	1.18131	0.850644	1.93327	2.19652
	1.862	1.495	0.946365	0.651836	1.02105	0.92006	1.6945	1.82841
	0.948	1.653	0.834859	0.716612	2.99746	1.38871	1.61903	0.138876
		1.413	0.498779		1.43206		0.721193	2.47957
		0.935	0.947897		0.843452		0.990191	0.883777
		3.461	0.532174		1.29346		1.02694	1.39938
			0.600277					1.01531
								1.2193
Average	1	1.88104	0.916407	0.97083	1.30985	1.23289	1.3019	1.20996
Standard Dev	0.419427	0.971038	0.456363	0.401293	0.700605	0.610003	0.590821	0.562273
Standard Error	0.0915264	0.198212	0.0912726	0.0875693	0.14301	0.133114	0.120601	0.110271
