# Supplementary material for: BDNF/TrkB signaling endosomes in axons coordinate CREB/mTOR activation and protein synthesis in the cell body to induce dendritic growth in cortical neurons
Source: eLife. 2023 Feb 24;12:e77455. doi: 10.7554/eLife.77455 (PMC9977295; doi:10.7554/eLife.77455)
Supplement: Figure 9—source data 1. [file elife-77455-fig9-data1.xlsx]

## Sheet: Figure 9C
AHA levels
	Control	BDNF	KG501	KG501/BDNF	Torin 1	Torin 1/BDNF
	0.82914	2.14364	2.00167	1.48968	0.972071	1.46838
	0.908035	1.99746	2.22662	1.51409	0.97955	2.04625
	0.900019	1.90334	1.57927	0.851762	1.50747	2.24511
	1.01428	0.974819	2.02645	1.38922	0.743857	0.793838
	0.944015	2.06318	2.44908	1.64615	1.10424	0.785263
	0.810035	1.25218	2.43104	1.14609	1.09787	1.00284
	0.624752	0.917722	1.51107	1.05825	0.917904	1.00451
	1.19266	0.564579	1.50489	1.23125	0.900077	1.17472
	0.613171	0.898358	1.50807	0.661542	1.3969	0.999986
	1.51778	1.05804	1.21182	1.15002	0.675909	1.20193
	1.28904	1.59446	0.950837	0.739793	1.43331	0.821802
	1.01485	1.4487	0.567175	0.935327	1.63462	0.73209
	0.801408	2.04507	2.21224	0.848821	1.03473	1.14536
	0.834892	1.44307	2.62054	0.289233	0.819115	1.04781
	0.820761	1.24146	0.580667	0.739896	0.842549	1.10433
	1.06295	2.72975	0.6176	0.721769	0.905546	1.13792
	0.838636	1.84239	0.806647	1.11694	1.48555	1.13505
	0.725061	1.36374	2.7299	0.775679	0.335101	0.845624
	1.30497	2.20703	1.6426	0.698361	0.679439	1.17739
	2.03256	1.06372	2.81917	0.66008	0.763334	1.15754
	1.11409	2.46766	1.50479	0.88665	1.09534	1.1014
	0.805263	1.65767	0.953896	1.52153	1.74741	0.699707
	1.00938	1.98876	1.33951	0.993282	1.79105	0.475405
	1.24836	2.16677	1.66796	1.00453	1.34478	0.728839
	1.21519	2.14041	0.95641	0.943534	1.33044	1.41455
	1.19726	2.80905	1.15007	1.13252	2.00093	1.01165
	0.837051	3.02591	1.27789	0.833452	1.57384	1.00909
	1.13114	2.01323	0.961626	1.28933	0.604346	0.156082
	1.6918	1.9561	1.34155	0.834756	0.688597	0.448442
	1.12326	3.03427	0.885101	0.75232	2.07794	0.339758
	0.94681	2.35882	1.08356	1.11239	2.16191	0.355034
	1.12209	2.94741	1.47151	1.04352	1.83142	0.145953
	0.930845	2.14837	1.83165	1.59021	1.45557	0.413594
	0.512028	2.53643	1.21264	1.10234	1.36658	0.749871
	1.24423	2.09415	1.36416	0.872375	0.609012	0.432464
	1.85486	3.13521	2.03965	0.97245	0.59253	0.546998
	1.23	2.31703	1.22943	1.18935	1.91349	0.325541
	1.17224	2.79785	0.976649	1.86282	1.26108	1.05916
	0.735032	2.04238	0.868467	1.9862	1.33456	0.981454
	0.954482	4.26681	1.08545	0.723295	1.25676	0.995007
	0.61293	2.84551	0.817829		0.956572	1.08171
	0.899327	1.62468	0.522185		1.41116	1.14416
	0.721435	1.96847	0.299507		1.34905	0.485484
	1.09911	0.882648	0.261023		1.15268	1.15638
	0.137786	1.7722	0.800659		1.26228	0.854075
	0.374974	0.70524	0.488348		0.94914	0.906623
	0.886291	1.10939	0.587607		0.862626	0.890643
	0.873383	1.17731	0.398492		0.696062	0.712645
	0.914462	1.1038	0.315447		2.42973	0.56191
	0.860752	0.846684	0.4956		1.13055	0.884119
	0.895361	1.60443	0.579803		0.694959	1.24051
	0.403519	1.31724	1.36082		1.07838	1.26608
	1.10528	0.682439	0.639788		2.7681	0.62914
	1.46302	0.846939	0.408943		1.16192	1.71045
	0.978789	2.10618	0.228536		0.736817	0.873333
	1.41703	0.95177	0.449632		0.8366	1.06426
	1.31166	1.28401	1.1757		0.584266	0.829846
	0.890453	0.254522	1.50061		0.664482
		1.12302	1.52108		0.954911
		1.03823	1.95079		1.06028
		1.57984	0.57973		0.839154
		1.28249
		0.902941
		1.78762
		1.67025
		1.52605
Average	1	1.73713	1.22265	1.05777	1.17781	0.924722
Standard Dev	0.334672	0.755383	0.666844	0.355108	0.489308	0.40166
Standard Error	0.0439446	0.0929813	0.0853806	0.0561476	0.0626494	0.0532011

## Sheet: Figure 9D
Arc levels
	Control	BDNF	KG501	KG501/BDNF	Torin 1	Torin 1/BDNF
	1.22089	13.9946	1.93593	2.5991	1.13009	1.09829
	0.719253	12.3419	2.0252	3.83201	1.22693	0.770546
	1.18976	10.8795	2.3222	4.05328	0.730429	0.63553
	1.01091	12.4319	2.89504	1.15624	1.09004	0.373599
	0.89805	13.3891	1.14515	1.05442	1.17871	0.254313
	0.831009	6.45881	1.70094	1.29641	1.15786	0.496719
	0.853729	9.85572	1.83462	1.13721	0.766508	0.678707
	1.96832	12.2037	0.973942	1.32063	0.879713	0.119044
	1.24952	7.7397	2.29677	1.60978	0.775287	0.583688
	1.18162	3.54335	2.1595	1.20735	1.16625	0.56233
	0.448731	2.24423	2.66804	0.828223	1.86432	1.05651
	1.10299	2.08143	2.49799	0.843016	0.843938	0.92424
	1.01538	1.82701	1.39742	1.13149	0.940542	1.04673
	1.1247	1.32746	1.96287	1.01396	1.60166	0.366124
	1.0125	1.47452	3.14598	1.10316	0.388825	0.96219
	0.770801	2.09872	1.77253	1.08592	0.258908	1.72559
	0.697064	2.78335	1.57298	1.41231	1.2019	1.04381
	0.704765	2.37582	2.60747	1.03234	1.09725	0.826274
	0.827122	1.65801	2.75697	1.71645	1.00918	0.71284
	0.732783	2.63427	2.19993	0.913432	0.943962	1.66149
	1.09692	2.56116	0.913881	1.58237	1.29842	1.56289
	1.13879	2.53077	1.47107	0.86121	0.94073	2.3836
	0.832862	2.05399	1.08014	1.13824	0.900144	2.83755
	1.17587	2.01166	0.93057	2.00345	1.05931	2.02016
	0.889008	1.41034	0.679708	0.923631	1.67983	1.28526
	1.07082	2.15188	0.717174		2.83491	1.92583
	1.24693	2.33728	0.919187		1.40841	1.32509
	1.04134	3.04122	1.58248		2.31533	1.36074
	0.891437	2.65586	0.846176		1.71575	1.41243
	1.05611	2.68886	1.12045		1.33932	2.74611
		2.31887	0.536865		0.938476	1.58764
		2.38209	0.865054		1.28611	1.6594
		1.47296	0.702437		1.92056	2.29301
		0.83984	0.67284		1.43011	3.33103
		1.57781	0.787949		1.3116	2.06288
		2.48934	1.10647		1.33526	3.1053
		2.18665	0.424859		1.36987	2.06316
		2.36794				1.99013
		2.24641				1.91457
		1.14478
		1.11669
Average	1	4.07145	1.54672	1.47423	1.22531	1.40424
Standard Dev	0.269268	3.94502	0.760437	0.844125	0.486251	0.814308
Standard Error	0.0491613	0.616109	0.125015	0.168825	0.0799392	0.130394
