# Supplementary material for: BDNF/TrkB signaling endosomes in axons coordinate CREB/mTOR activation and protein synthesis in the cell body to induce dendritic growth in cortical neurons
Source: eLife. 2023 Feb 24;12:e77455. doi: 10.7554/eLife.77455 (PMC9977295; doi:10.7554/eLife.77455)
Supplement: Supplementary file 1. [file elife-77455-supp1.xlsx]

## Sheet: Materials
Culture
Reagent	Brand	catalog	Aditional information	City; State; Country
Antibiotic-Antimycotic (100X)	Gibco	15240062		Carlsbad, CA; USA
B27 supplement	Gibco	17504044		Carlsbad, CA; USA
Cytosine-B-D-Arabinofuranoside	Sigma-Aldrich	C1768		St. Louis, MO; USA
DMEM, high glucose, no glutamine, no methionine, no cystine	Gibco	21013024		Carlsbad, CA; USA
DMEM, high glucose, pyruvate	Gibco	11995081		Carlsbad, CA; USA
Glutamax supplement	Gibco	35-050-061		Carlsbad, CA; USA
Hank’s Balanced Salt Solution plus calcium and magnesium (HBSS Ca++, Mg++)	Gibco	14025134 _x000B_		Carlsbad, CA; USA
				Carlsbad, CA; USA
Horse serum	Gibco	16050122		Carlsbad, CA; USA
Natural Mouse Laminin	Gibco	23017015	2 ug/mL for coating covers	Carlsbad, CA; USA
Neurobasal medium	Gibco	21103049		Carlsbad, CA; USA
Penicillin-Streptomycin (10,000 U/mL)	Gibco	15140-122		Burlington, ONT; Canada
Poly-D-Lysine	Corning	354210	0.1 mg/mL for coating covers	Bedford;,MA, USA
syldgardTM 184 silicone elastomer	Dow corning	4019862		Dow way Midland, MI; USA
Trypsin 2,5 % 10X	Gibco	15090046 _x000B_		Carlsbad, CA; USA
Lipofectamin 2000	Life Technologies	11668019		Carlsbad, CA; USA
PEI	Polysciences Inc	23966-1		Warrington, PA; USA
optimem	Gibco	11058021		Carlsbad, CA; USA
Fetal bovine serum	Hyclone	1HC-SH30396.02		Canada
L-cystine	Sigma-Aldrich	c7602		St. Louis, MO; USA
Dimethyl sulfoxide	Sigma-Aldrich	D2650		St. Louis, MO; USA
Salts and reagents
30% acrylamide/Bis Solution	Bio-Rad	1610156		Hercules, CA; USA
Ampicilin	Sigma-Aldrich	A0166		St. Louis, MO; USA
ATP	Sigma-Aldrich	A26209		St. Louis, MO; USA
Bicine	Sigma-Aldrich	B3876		St. Louis, MO; USA
BirA-GST	BPS Bioscience	70031		San Diego, CA; USA
Boric acid (H3BO3)	Sigma-Aldrich	B0394		St. Louis, MO; USA
Bovine serum albumin (BSA)	Jackson	001-000-162		West Grove, PA; USA
D-Biotin	Sigma-Aldrich	B4639		St. Louis, MO; USA
Deoxycholic Acid	Sigma-Aldrich	D2510		St. Louis, MO; USA
Dynabead MyOne Streptavidin C1	Invitrogen	65001		Carlsbad, CA; USA
EDTA	Sigma-Aldrich	E6758		St. Louis, MO; USA
Fish gelatin	Sigma-Aldrich	G7041	3 % for immunofluorescence	St. Louis, MO; USA
Imidazole	Sigma-Aldrich	I5513		St. Louis, MO; USA
MgOAc	Millipore	1.05819.0250		Burlington, MA; USA
Mowiol 4-88	Millipore	475904		Billerica. MA; USA
Ni-NTA-beads	Qiagen	30250
Pierce BCA Protein assay kit	Thermo-Fisher	23225		Rockford, IL; USA
PMSF	Sigma-Aldrich	78830		St. Louis, MO; USA
Protease inhibitor cocktail	Sigma-Aldrich	P8340		St. Louis, MO; USA
Phosphatase Inhibitor Mini Tablets	Thermo-Fisher	A32957		Rockford, IL; USA
Probes, kits and antibodies
Cholera toxin subunit B (recombinant), alexa 488	Invitrogen	C34775	1:1000 for culture	Carlsbad, CA; USA
Cholera toxin subunit B (recombinant), alexa 594	Invitrogen	C34777	1:1000 for culture	Carlsbad, CA; USA
Cholera toxin subunit B (recombinant), alexa 647	Invitrogen	C34778	1:1000 for culture	Carlsbad, CA; USA
Click-IT AHA (L-azidohomoalanine)	Invitrogen	C10102	0.1 mM	Carlsbad, CA; USA
Click-IT cell reaction buffer kit	Invitrogen	C10269		Carlsbad, CA; USA
Goat anti mouse IgG (H+L) secondary	Invitrogen	A21424	1:5000 for WB	Carlsbad, CA; USA
TUNEL mix; In Situ Cell Death Detection Kit	Roche	11684795910		Mannheim; Germany
Mouse anti Gapdh (6C5)	Santa Cruz	Sc-32233	1:1000 for WB
Mouse anti- β-III Tubulin	Sigma Aldrich	T8578	1:750 for IF	St. Louis, MO; USA
Mouse Anti-Flag	Sigma-Aldrich	F3040	1:750 for IF	St. Louis, MO; USA
Streptavidin DyLight488	Invitrogen	21832		Carlsbad, CA; USA
Streptavidin Qdot655	Invitrogen	Q10121MP		Carlsbad, CA; USA
Rabbit Anti-AKT total	Cell signaling	9272	1:1000 for WB	Danvers, MA; USA
Rabbit Anti-ARC	Abcam	Ab118929	1:300 for IF	Discontinued
Rabbit anti-BDNF	Alomone	ANT-010	1:500 for WB	Jerusalem BioPark; Israel
Mouse anti-MAP2	Merk-Millipore	MAB3418	1:500 for IF	Billerica, MA; USA
Rabbit anti-Map2	Merk-Millipore	AB5622	1:500 for IF	Billerica, MA; USA
Rabbit Anti-phospho 4E-BP1 (S65)	Cell Signaling	9456S	1:500 for IF; 1:1000 for WB	Danvers, MA; USA
Rabbit Anti-Phospho AKT (S473)	Cell Signaling	9271	1:1000 for WB	Danvers, MA; USA
Rabbit Anti-Phospho S6 ribosomal protein (S235/236)	Cell Signaling	2211S	1:100 for IF; 1:1000 for WB	Danvers, MA; USA
Rabbit anti-phospho TrkB (Y674/675)	Cell Signaling	4621	1:200 for IF	Danvers, MA; USA
Rabbit Anti-phospho TrkB (Y816)	Sigma-Aldrich	ABN1381	1:200 for IF; 1:1000 for WB	St. Louis, MO; USA
Rabbit-Anti-phospho CREB (S133)	Cell Signaling	9198	1:500 for IF	Danvers, MA; USA
Donkey Anti-mouse Alexa 647	Invitrogen	A-31571	1:500 for IF	Carlsbad, CA; USA
Donkey anti-rabbit Alexa 488	Invitrogen	A-21206	1:500 for IF	Carlsbad, CA; USA
Donkey Anti-mouse Alexa 555	Invitrogen	A-31570	1:500 for IF	Carlsbad, CA; USA
Rabbit Anti-mCherry	Cell Signaling	E5D8F	1:1000 for IF	Danvers, MA; USA
NucBlue (Hoechst)	Life Technologies	R37605	1:50 Nuclear dye for IF	Carlsbad, CA; USA
Drugs and treatments
hBDNF-biotin	Alomone labs	B-250-B	150 ng/ml	Jerusalem BioPark; Israel
hBDNF	Alomone labs	B-250	50 ng/mL	Jerusalem BioPark; Israel
TrkBfc	B&D system	688TK	100 ng/mL	Minneapolis, MN; USA
1NM-PP1	Cayman	221244-14-0	1 µM	Ann Arbor, MI; USA
K252a	Tocris	1683	200 nM	Bristol; UK
Naphthol AS-E phosphate (KG501)	Sigma-Aldrich	70485	10 µM	St. Louis, MO; USA
Torin 1	Tocris	4247	250 nM	Bristol; UK
Oligomicyn A	Sigma-Aldrich	75351	10 µM	St. Louis, MO; USA
Citoplasmic dynein inhibitor, Ciliobrevin D	Millipore	250401	20 µM	St. Louis, MO; USA
LY294002	Millipore	440202	10 µM	St. Louis, MO; USA
Xylacine 2%	Droguería Ñuñoa	1012843	use: 15 mg/kg	Santiago; Chile
Ketamine 100mg/mL	Droguería Ñuñoa	1008891	use: 150 mg/kg	Santiago; Chile
Ketoprofen 0,4% (Naxpet)	Drag Pharma		use: 1:300	Santiago; Chile
Plasmids, viruses and cell lines
EGFP (plasmid)	Prof Victor Faúndez	Department of Cell Biology. Emory University.
FLAG-TrkB (plasmid)	Prof Francis Lee	Weill Cornell Medicine, Cornell University
pcDNA3.1-BDNFavi (Plasmid)	Associate Prof, Chengbiao Wu	University of California, San Diego
HEK293FT	ATCC	CRL-1573TM		Manassas, VA; USA
AAV1-hSyn-GFP-CrebM1-WPRE-SV40Pa	Virovek	18-088		Hayward, CA; USA
AAV1-hSyn-GFP	Virovek	19-271		Hayward, CA; USA
AAV1-hSyn-mcherry	Virovek	15-246		Hayward, CA; USA
Animals
Species	Strain	Stock number	Source	City; state; country
Mus musculus	Ntrk2 tm1Ddg/J	22363	Jackson laboratory	Sacramento, CA; USA
Mus musculus	B6.129S4-Ngfrtm1Jae/J	2213	Jackson laboratory	Sacramento, CA; USA
Ratus norvegicus			Pontificia Universidad Catolica de Chile	Santiago; Chile
